# Supplementary material for: One pot synthesis of aryl nitriles from aromatic aldehydes in a water environment
Source: Royal Society of Chemistry journal article supplement (doi:10.1039/d1ra03559b), 2021-01-01
Supplement: d1ra03559b1.pdf [file d1ra03559b1.pdf]

## Supporting Information

### One Pot Synthesis of Aryl Nitriles from Aromatic Aldehydes in the Water Environment

Hongyan Lin<sup>1,2</sup>, Ziling Zhou<sup>1,2</sup>, Xiaopeng Ma<sup>1,2</sup>, Qingqing Chen<sup>1,2</sup>, Hongwei  
Han<sup>1,2</sup>, Jinliang Qi<sup>1,2</sup>, Xiaoming Wang<sup>1,2</sup>, Yonghua Yang<sup>1,2\*</sup>

<sup>1</sup>State Key Laboratory of Pharmaceutical Biotechnology, Institute of Plant  
Molecular Biology, School of Life Sciences, Nanjing University, Nanjing 210023,  
China.

<sup>2</sup>Co-Innovation Center for Sustainable Forestry in Southern China, Nanjing  
Forestry University, Nanjing 210037, China.

|                                                                         |    |
|-------------------------------------------------------------------------|----|
| <sup>1</sup> H NMR spectra of compounds 1b-25b.....                     | 2  |
| <sup>1</sup> H NMR spectra of the intermediate products 1A, 3A, 5A..... | 14 |
| <sup>13</sup> C NMR spectra of compounds 1b-25b.....                    | 16 |
| <sup>19</sup> F NMR spectra of compounds 15b-19b, 23b.....              | 28 |
| Reference m.p. of compounds 1b-25b.....                                 | 31 |

## <sup>1</sup>H NMR spectra of compound 1b-25b.

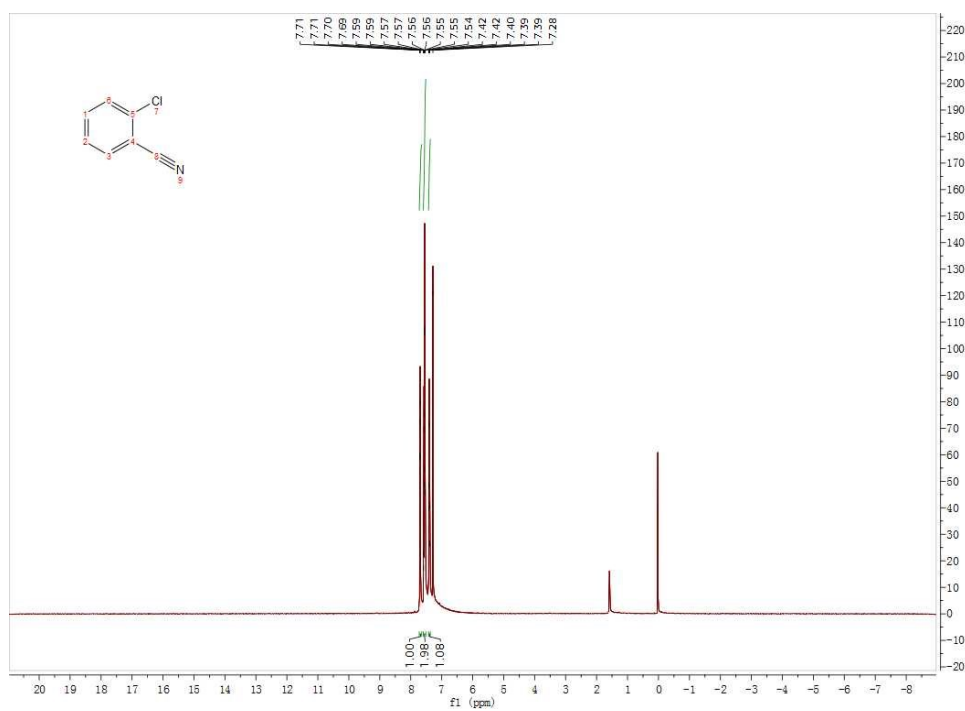

Figure S1 <sup>1</sup>H NMR spectra of compound 1b

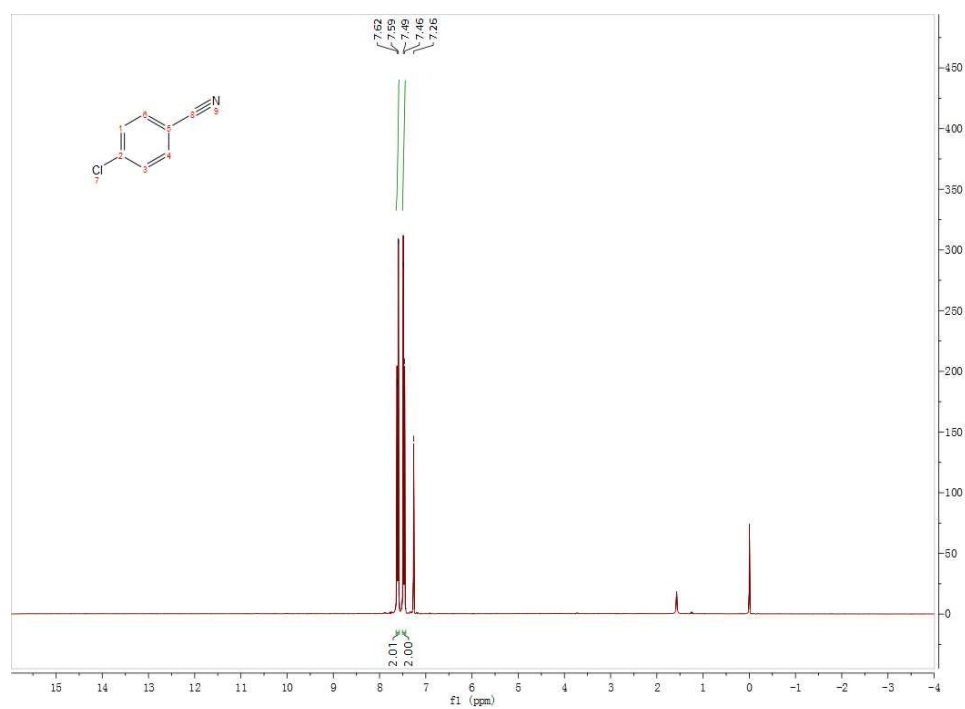

Figure S2 <sup>1</sup>H NMR spectra of compound 2b

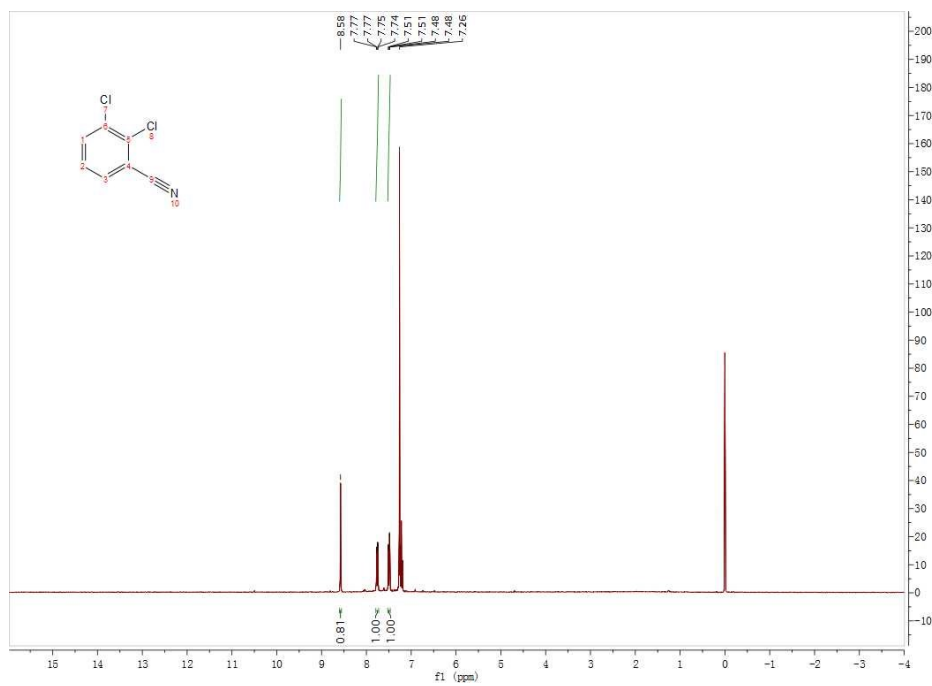

Figure S3  $^1\text{H}$  NMR spectra of compound 3b

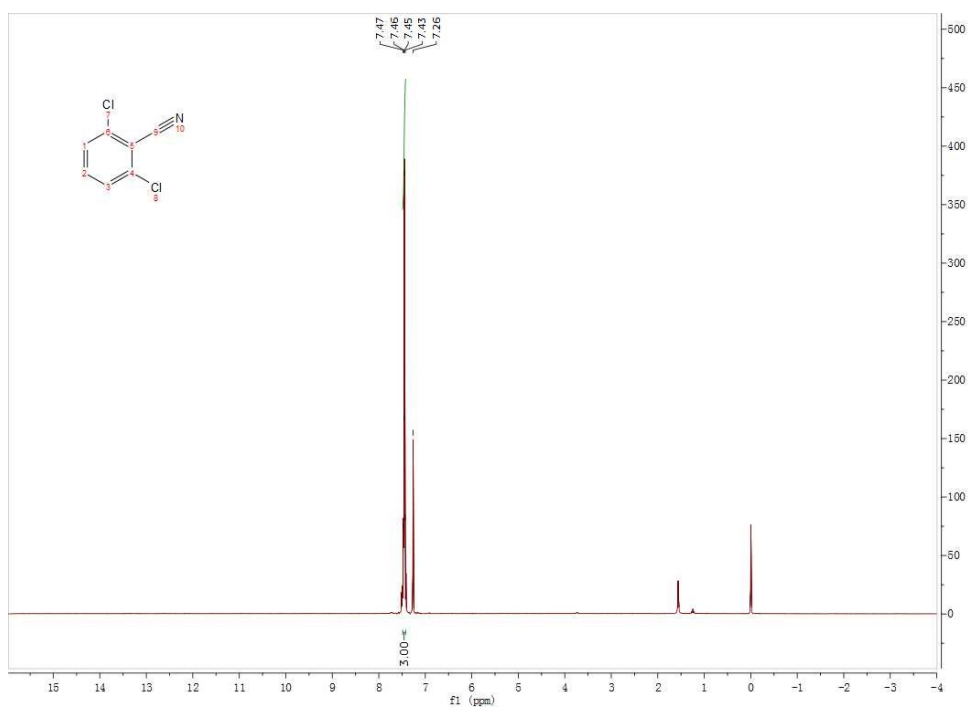

Figure S4  $^1\text{H}$  NMR spectra of compound 4b

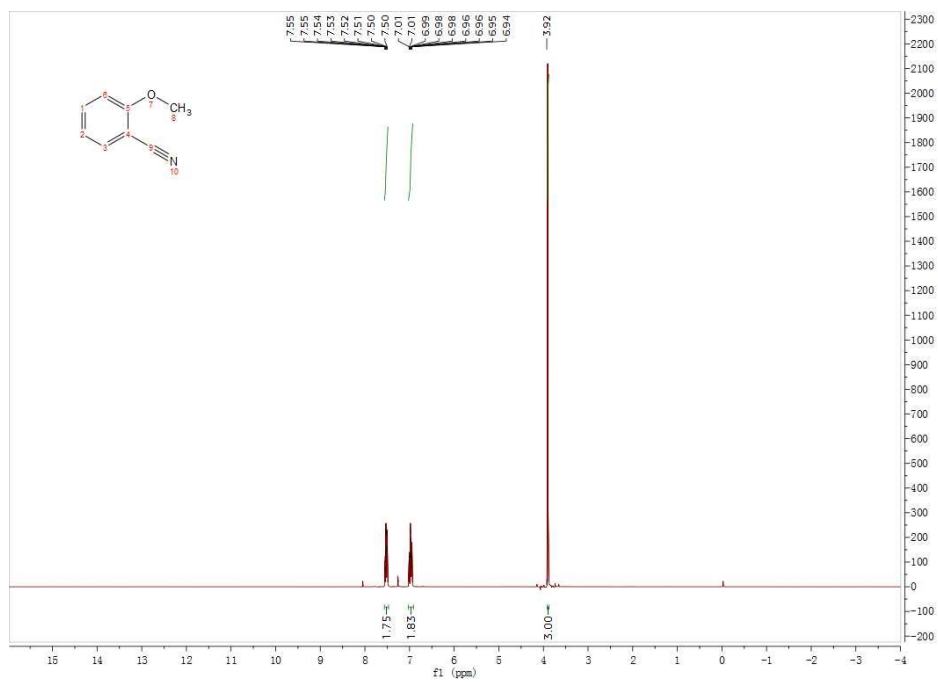

Figure S5  $^1\text{H}$  NMR spectra of compound 5b

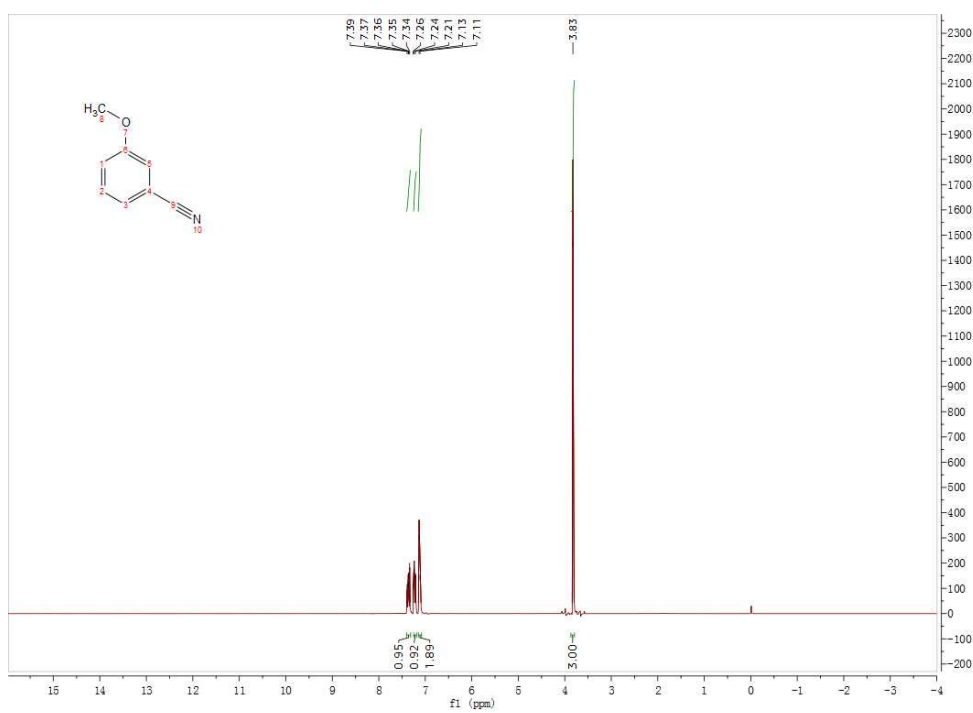

Figure S6  $^1\text{H}$  NMR spectra of compound 6b

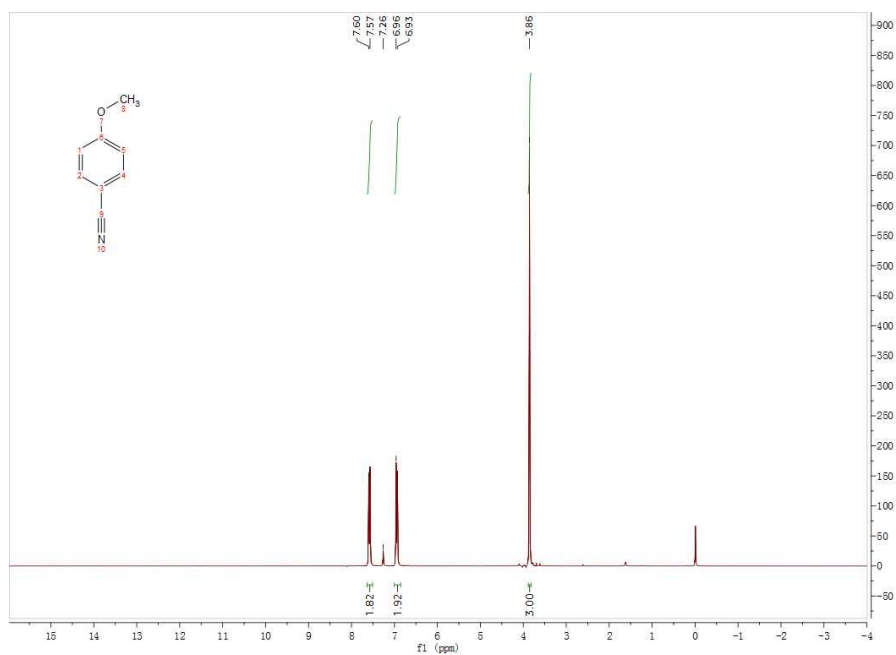

Figure S7  $^1\text{H}$  NMR spectra of compound 7b

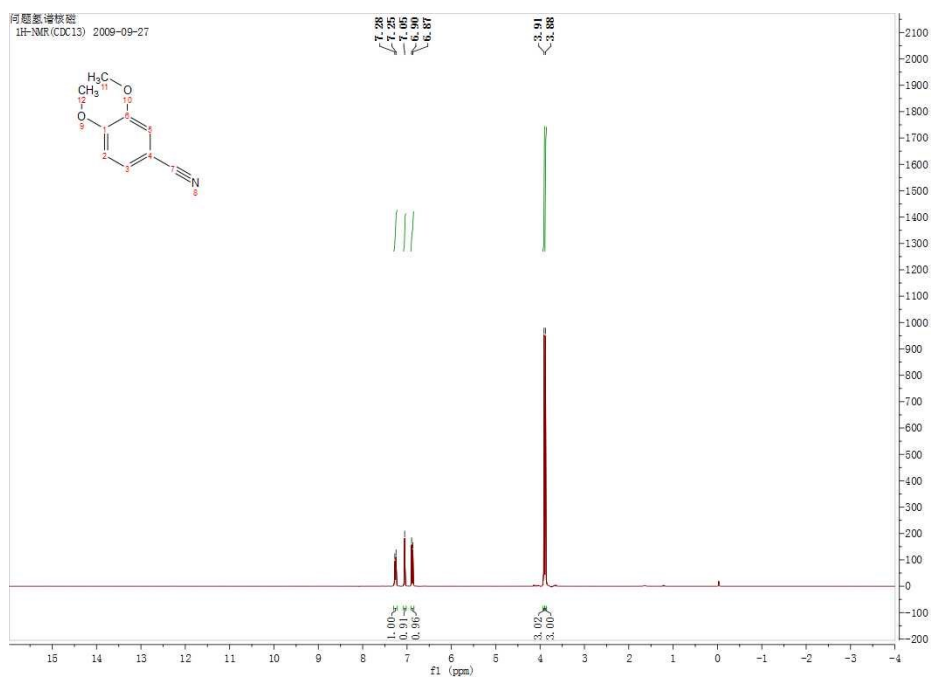

Figure S8  $^1\text{H}$  NMR spectra of compound 8b

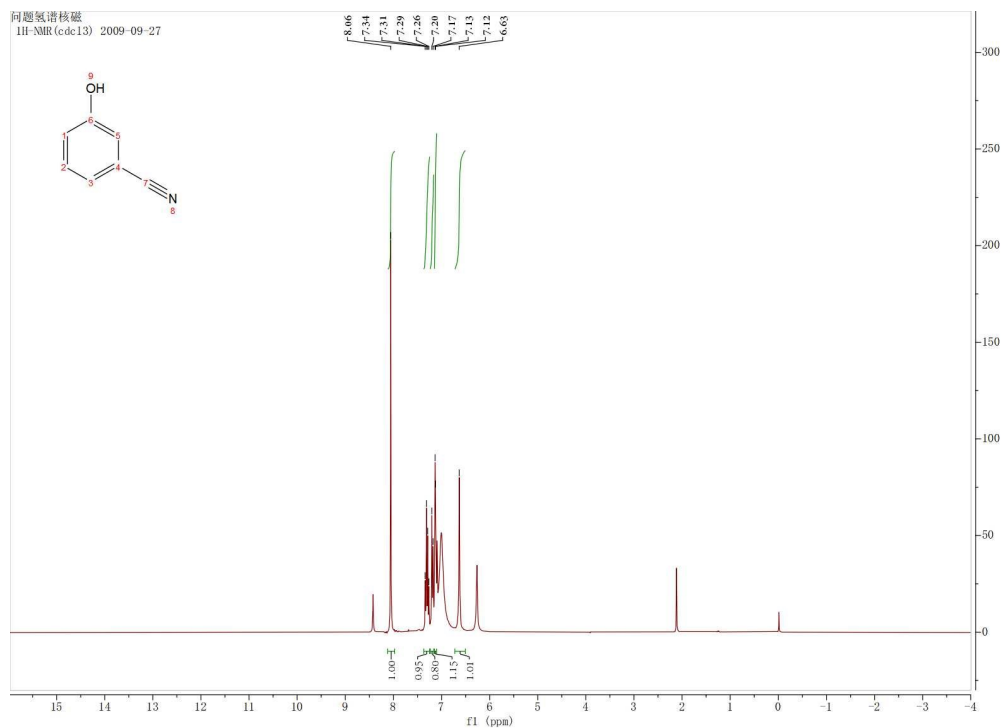

Figure S9 <sup>1</sup>H NMR spectra of compound 9b

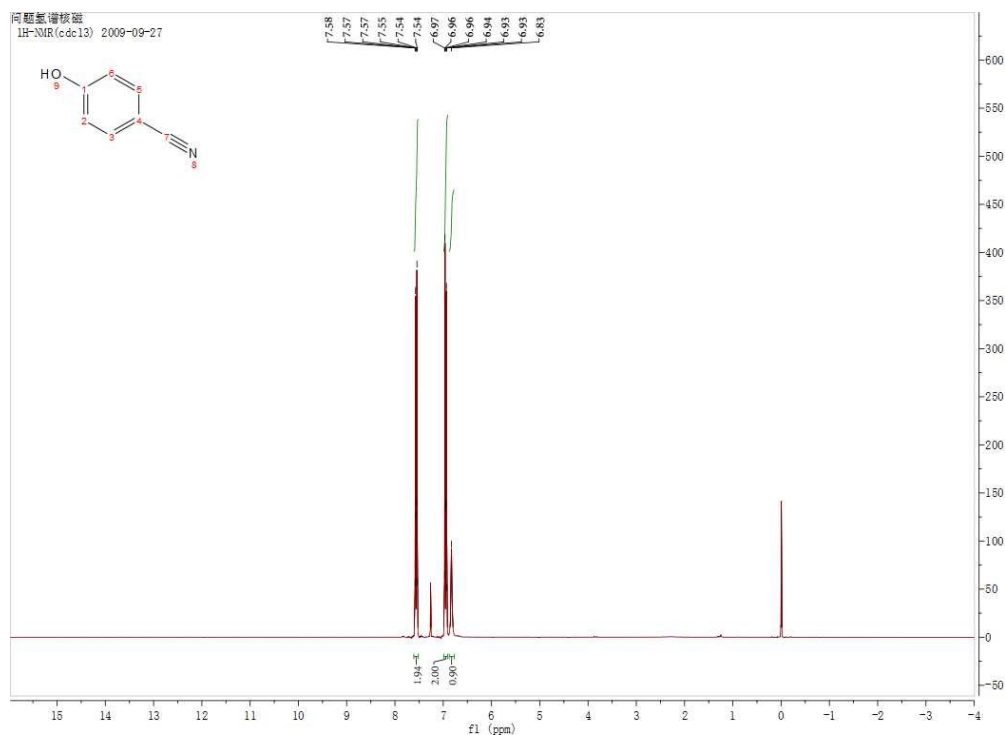

Figure S10 <sup>1</sup>H NMR spectra of compound 10b

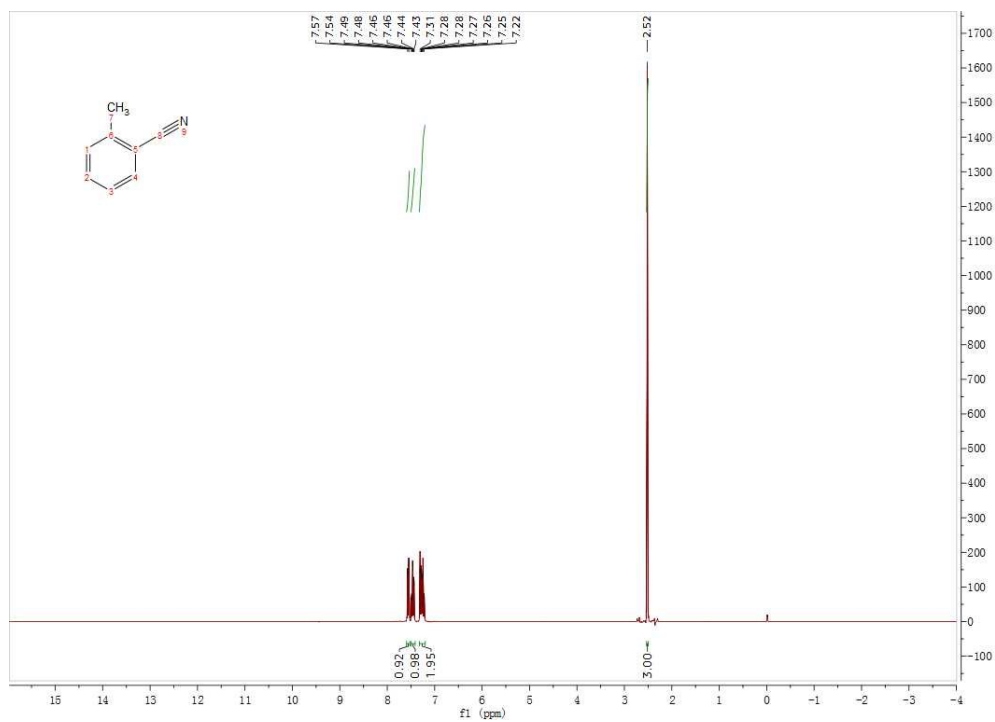

Figure S11  $^1\text{H}$  NMR spectra of compound 11b

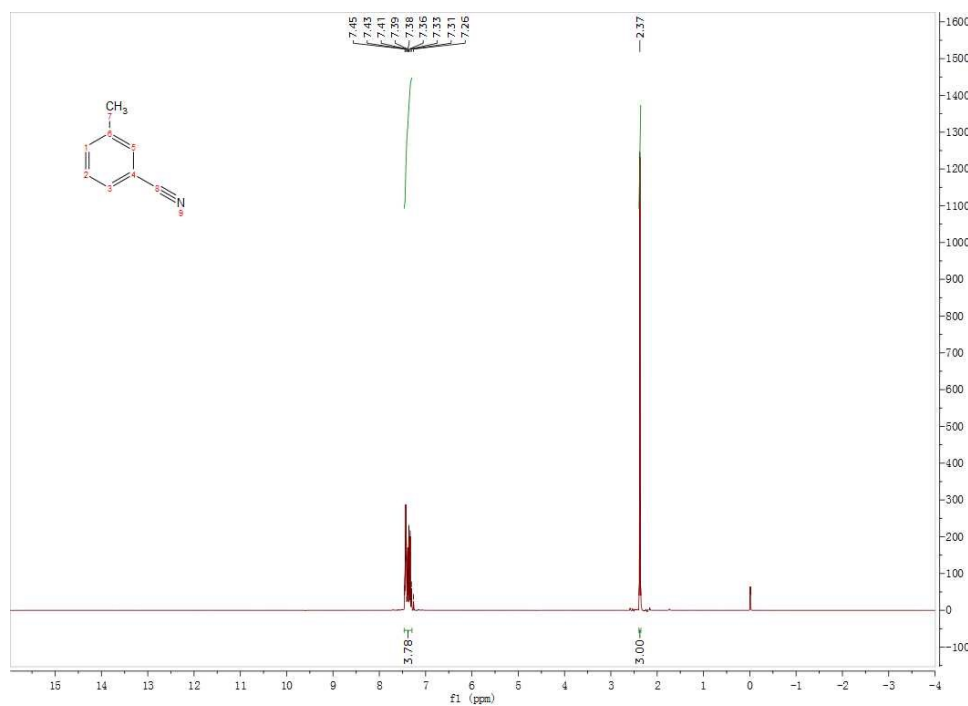

Figure S12  $^1\text{H}$  NMR spectra of compound 12b

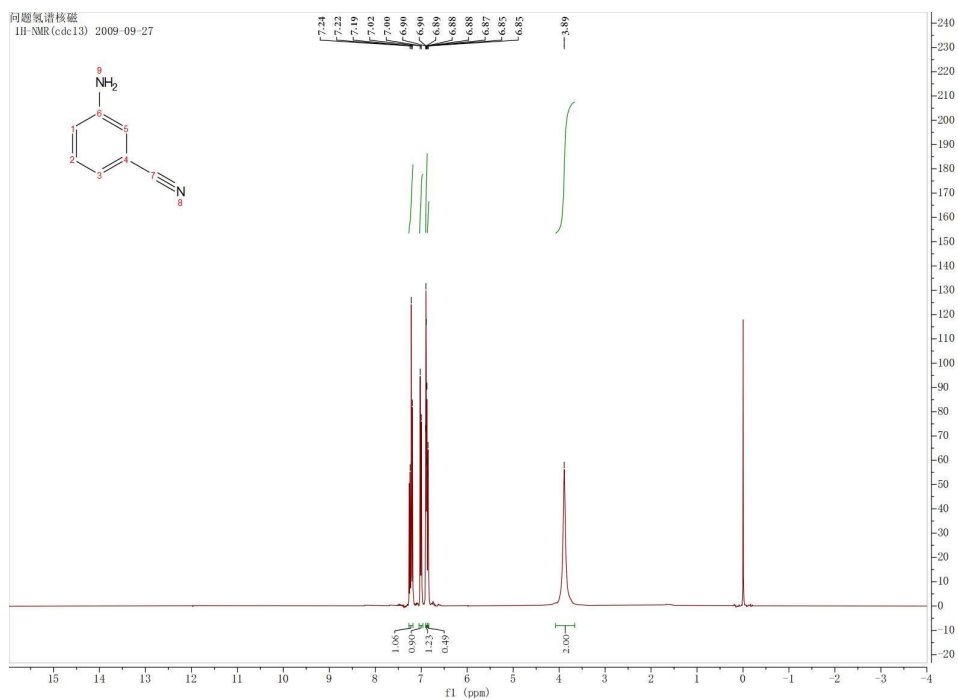

Figure S13 <sup>1</sup>H NMR spectra of compound 13b

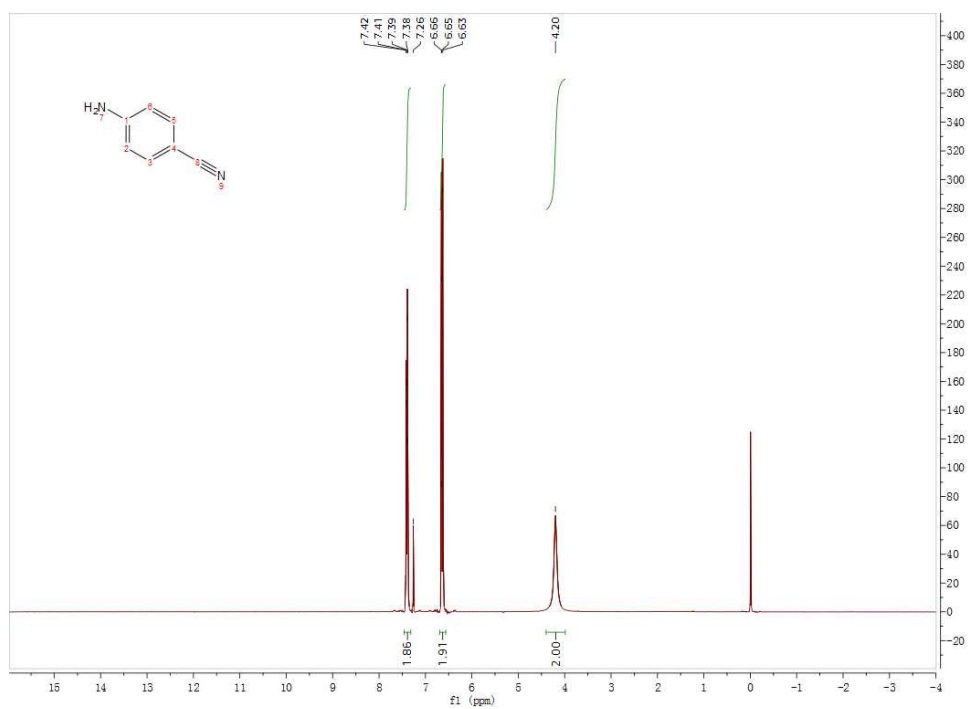

Figure S14 <sup>1</sup>H NMR spectra of compound 14b



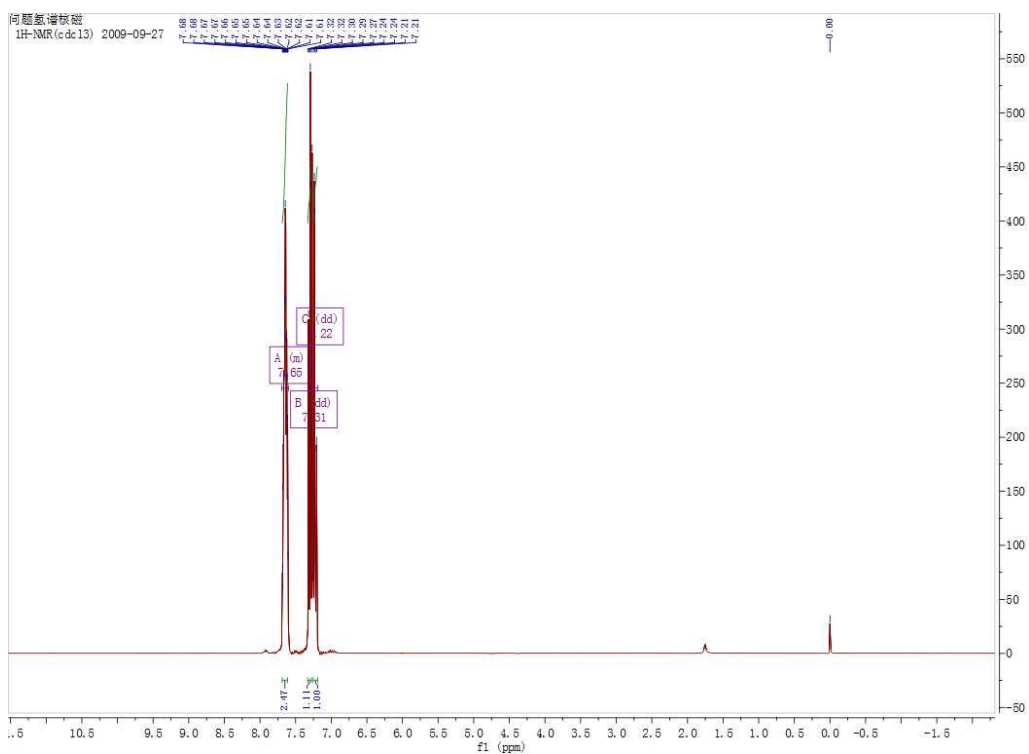

Figure S15  $^1\text{H}$  NMR spectra of compound 15b

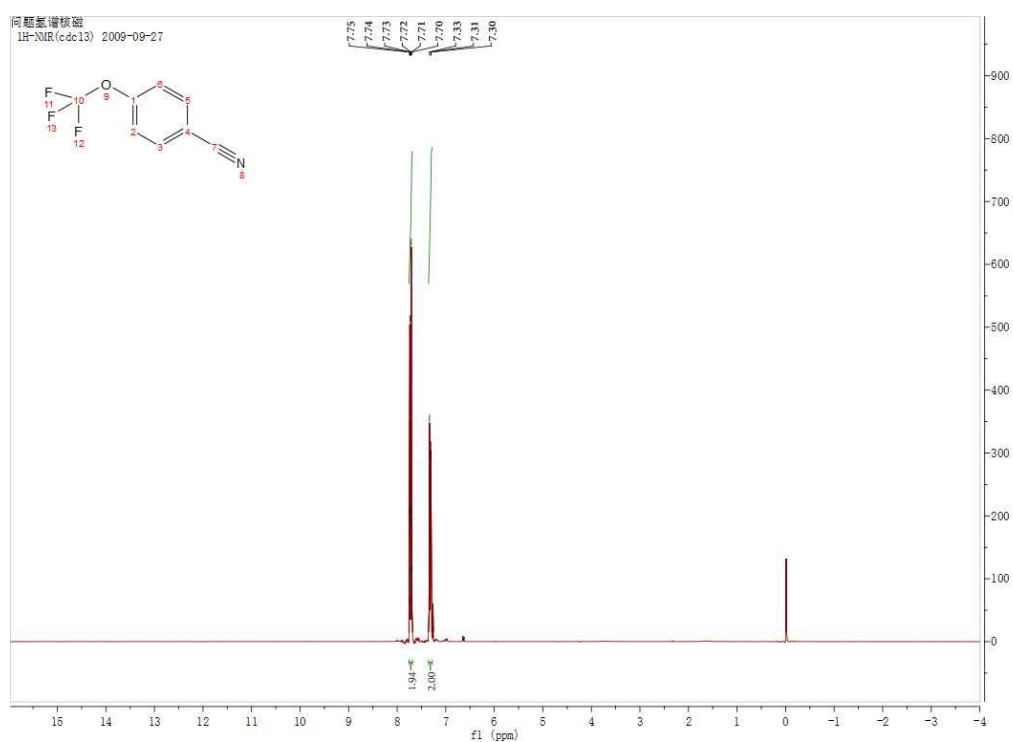

Figure S16  $^1\text{H}$  NMR spectra of compound 16b

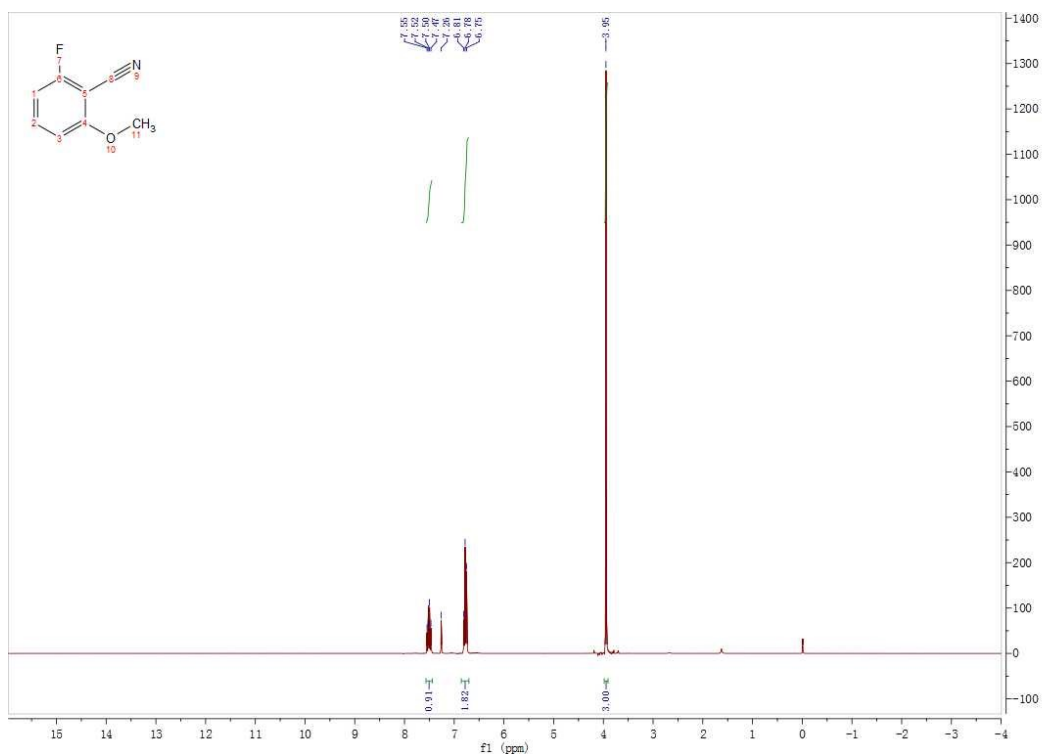

Figure S17 <sup>1</sup>H NMR spectra of compound 17b

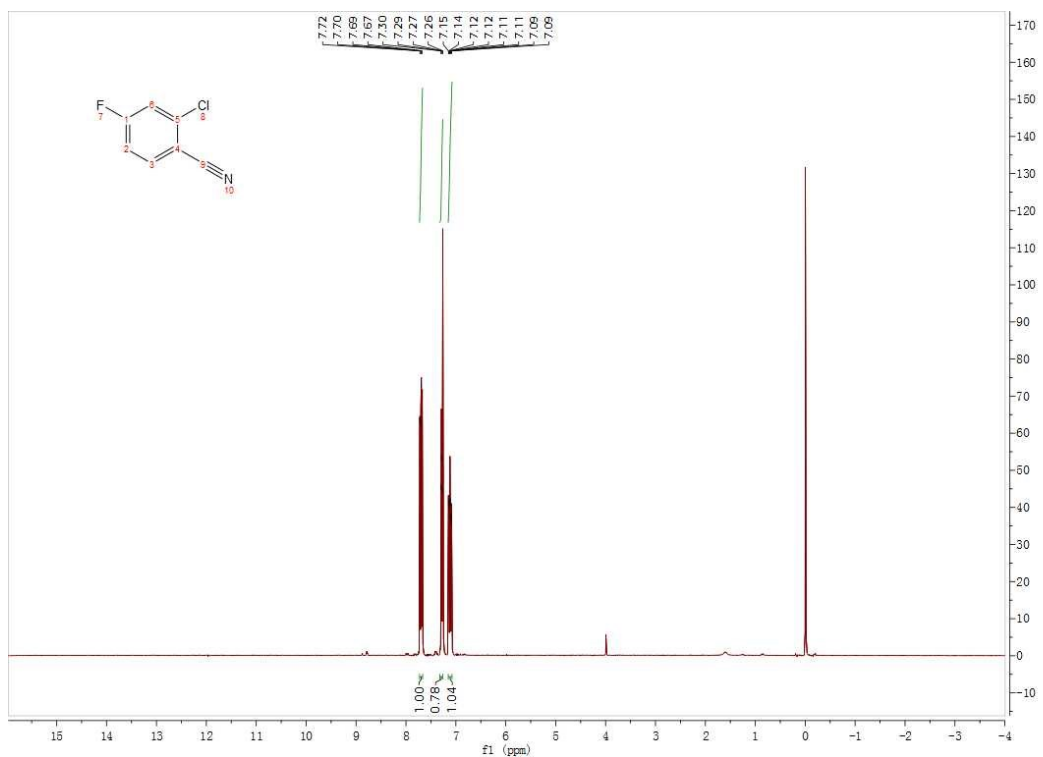

Figure S18 <sup>1</sup>H NMR spectra of compound 18b

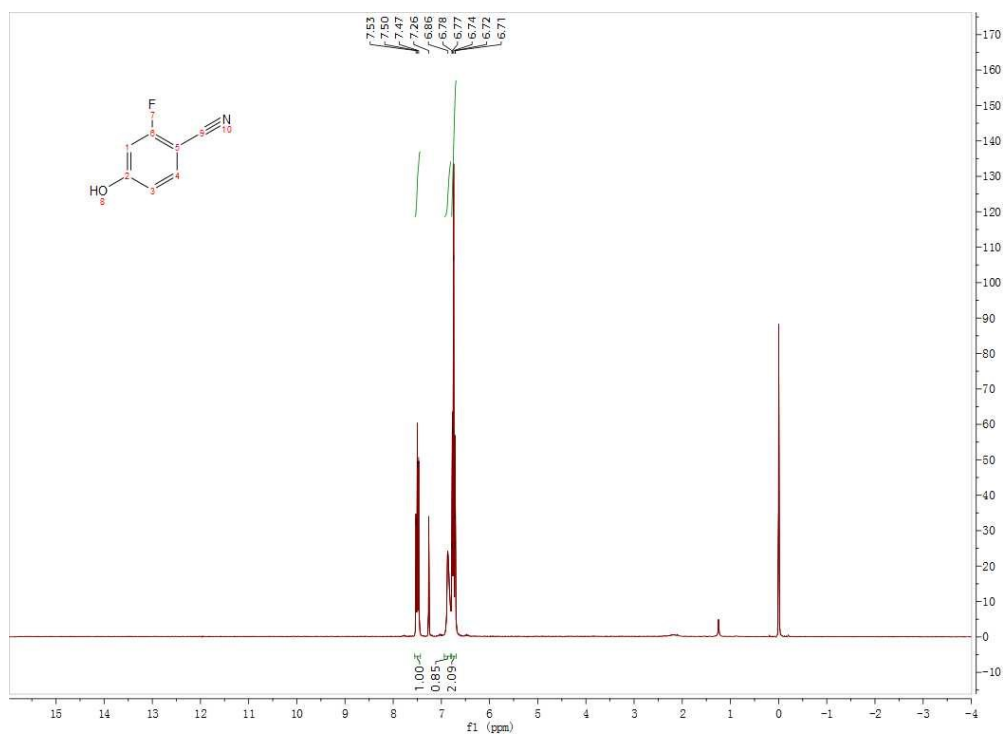

Figure S19  $^1\text{H}$  NMR spectra of compound 19b

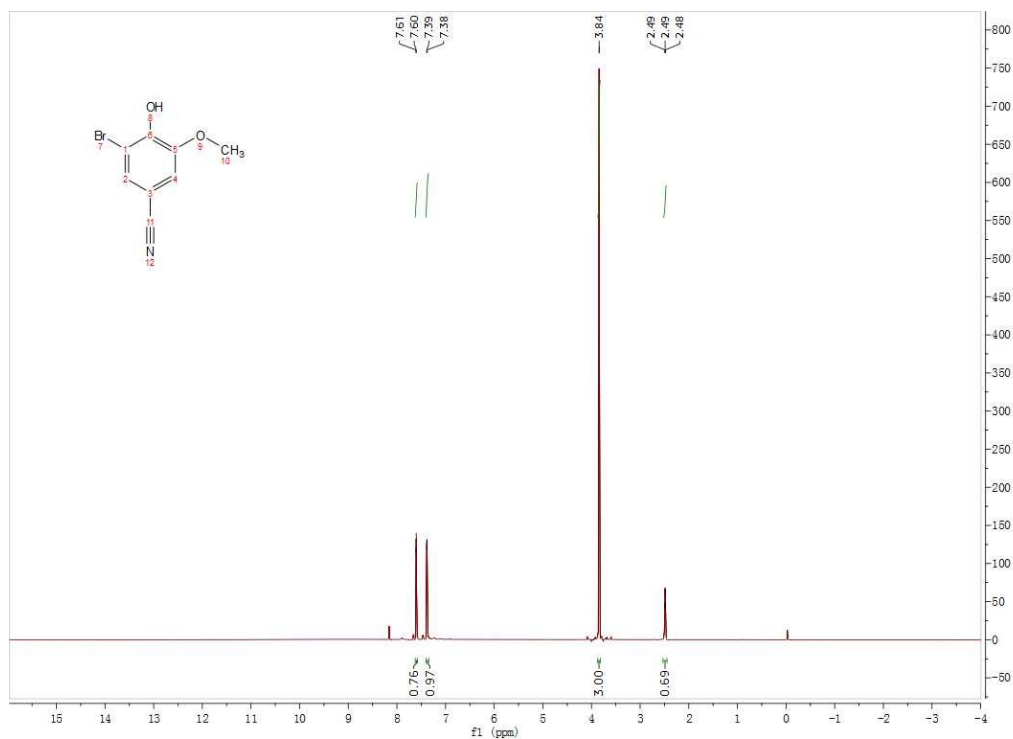

Figure S20  $^1\text{H}$  NMR spectra of compound 20b

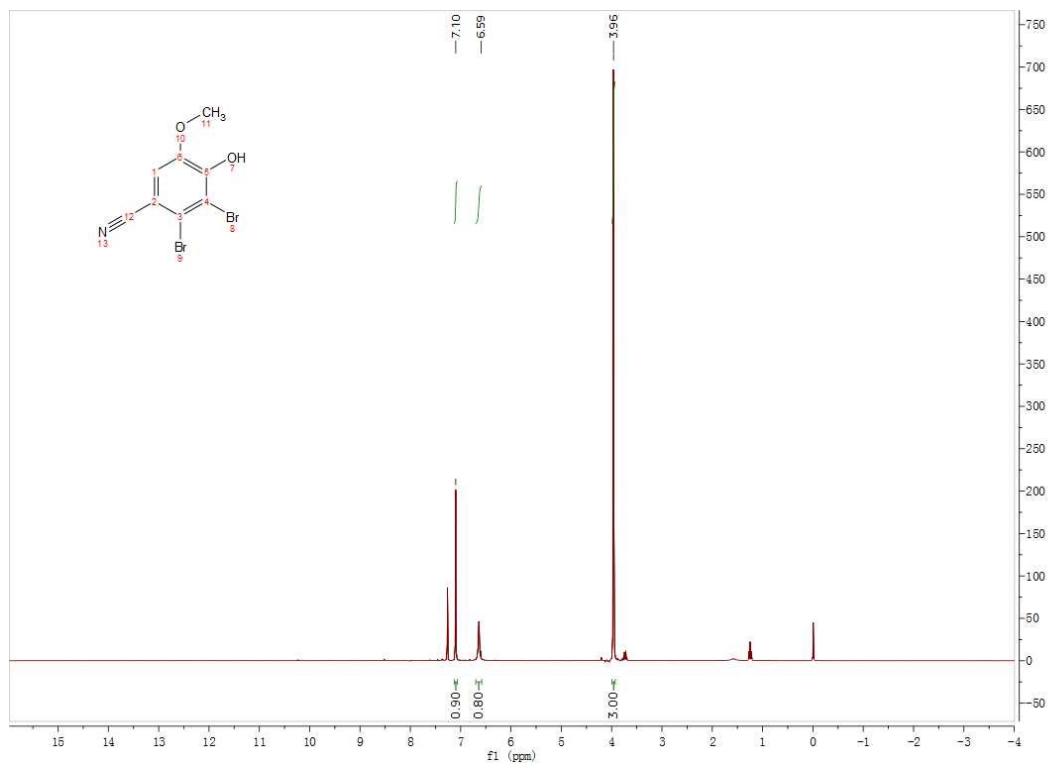

Figure S21 <sup>1</sup>H NMR spectra of compound 21b

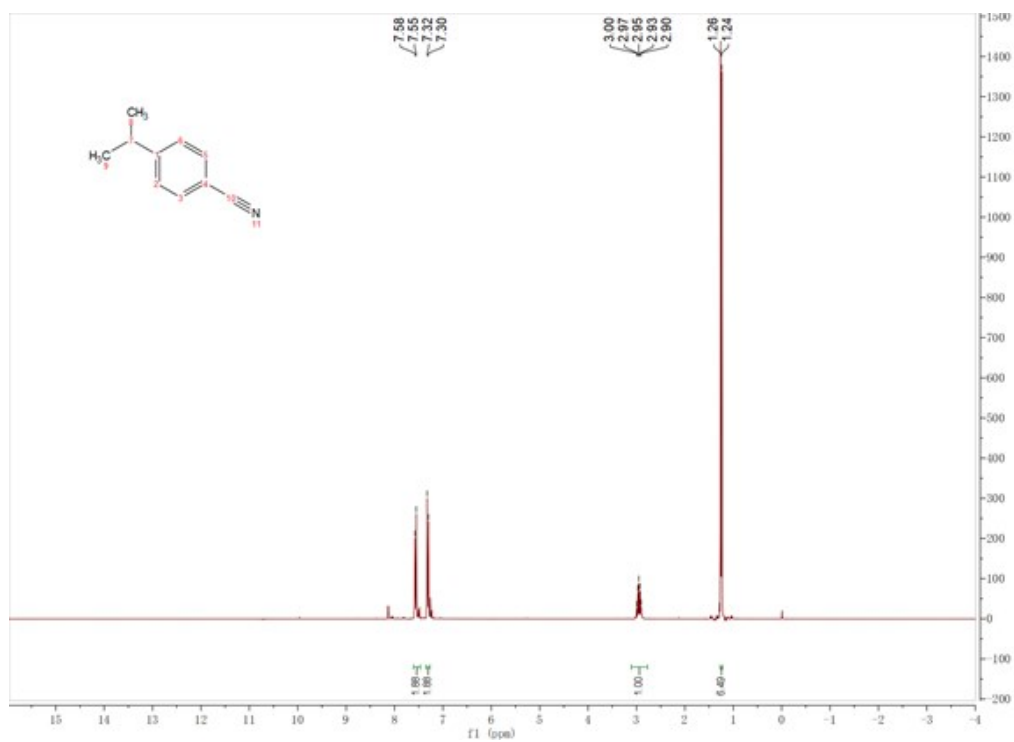

Figure S22 <sup>1</sup>H NMR spectra of compound 22b

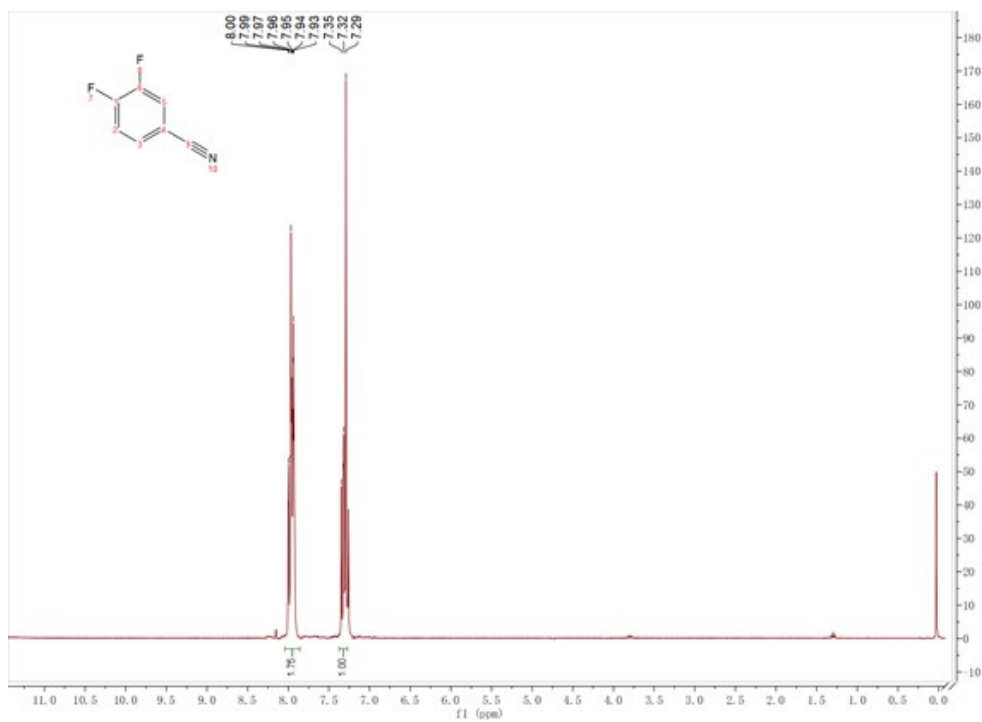

Figure S23  $^1\text{H}$  NMR spectra of compound 23b

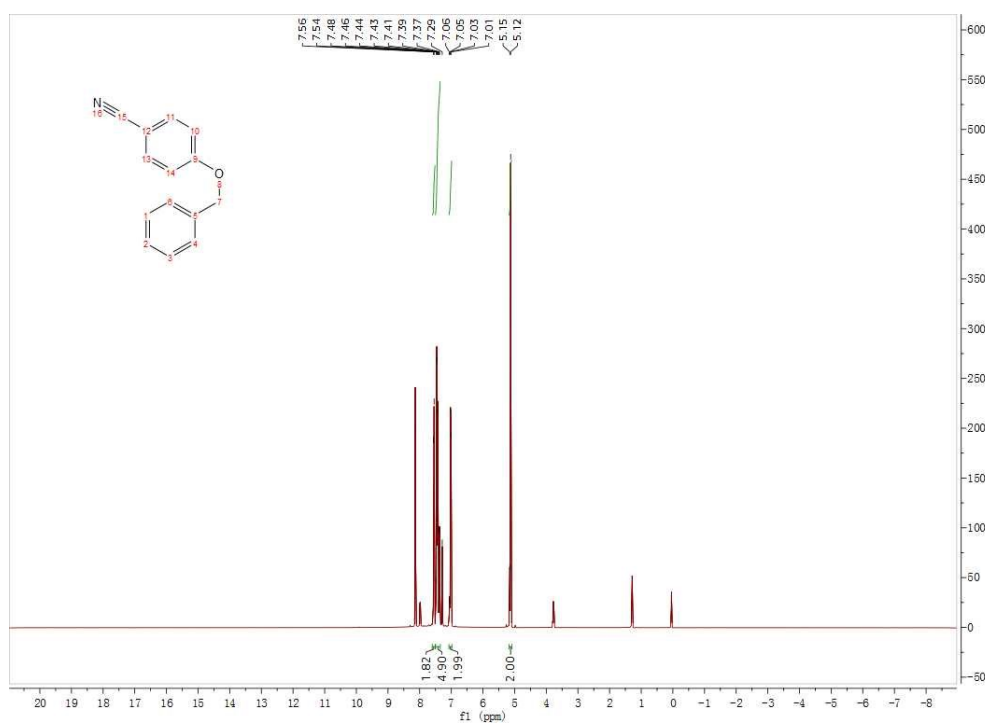

Figure S24  $^1\text{H}$  NMR spectra of compound 24b

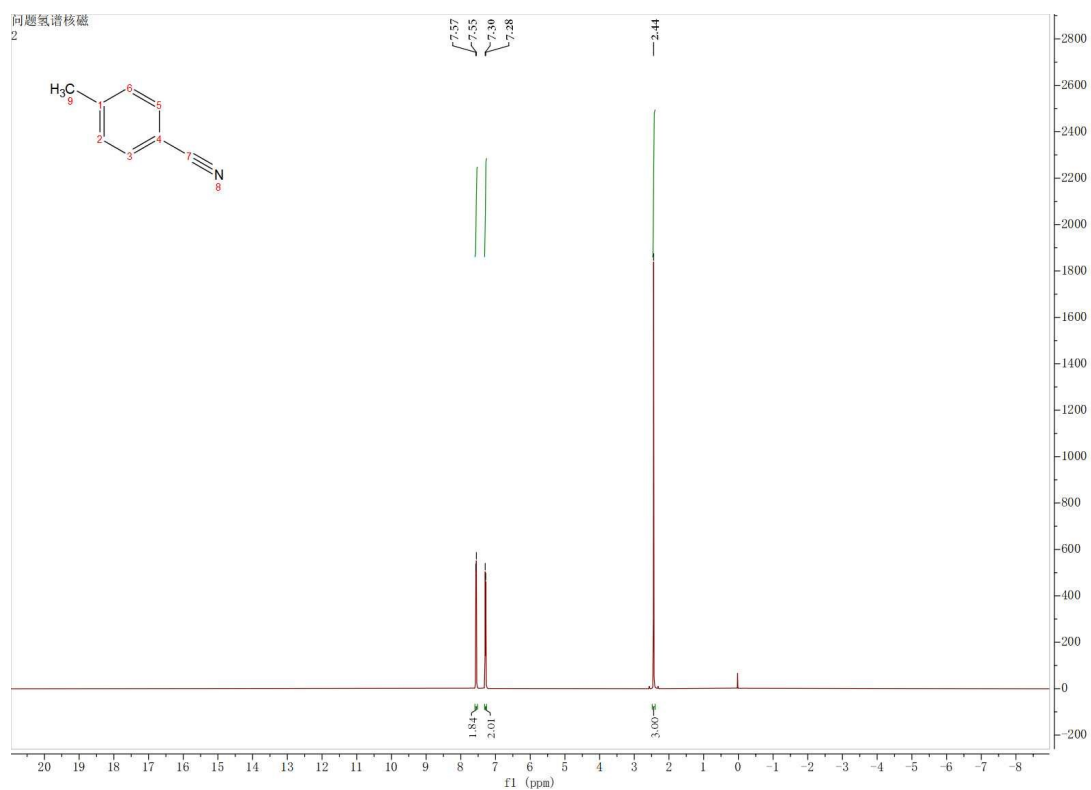

Figure S25  $^1\text{H}$  NMR spectra of compound 25b

**$^1\text{H}$  NMR spectra of the intermediate products.**

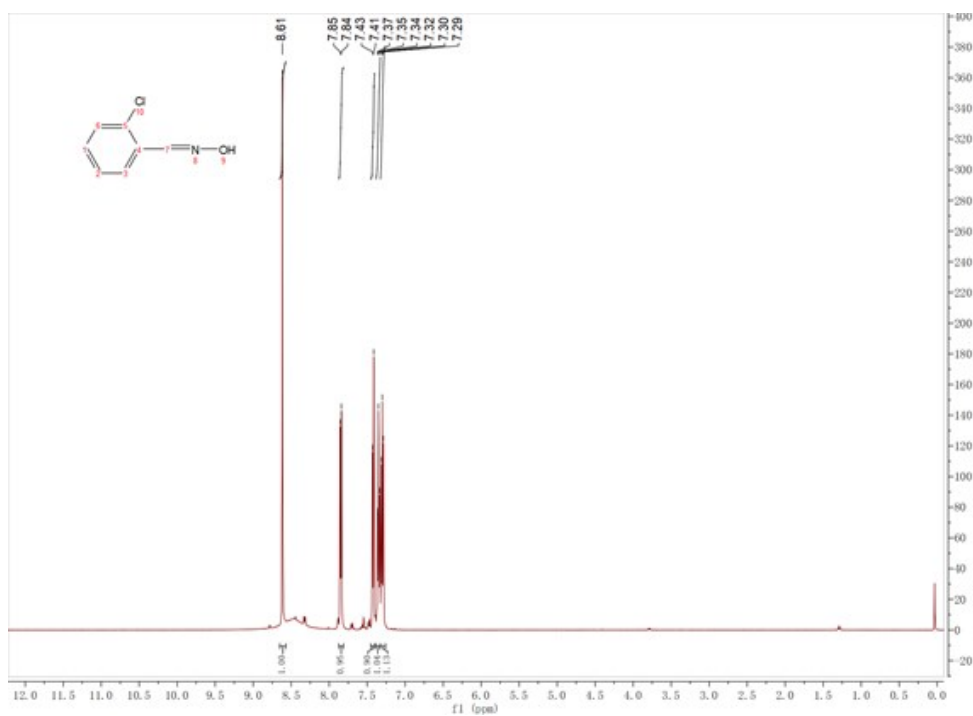

Figure S26  $^1\text{H}$  NMR spectra of 1A

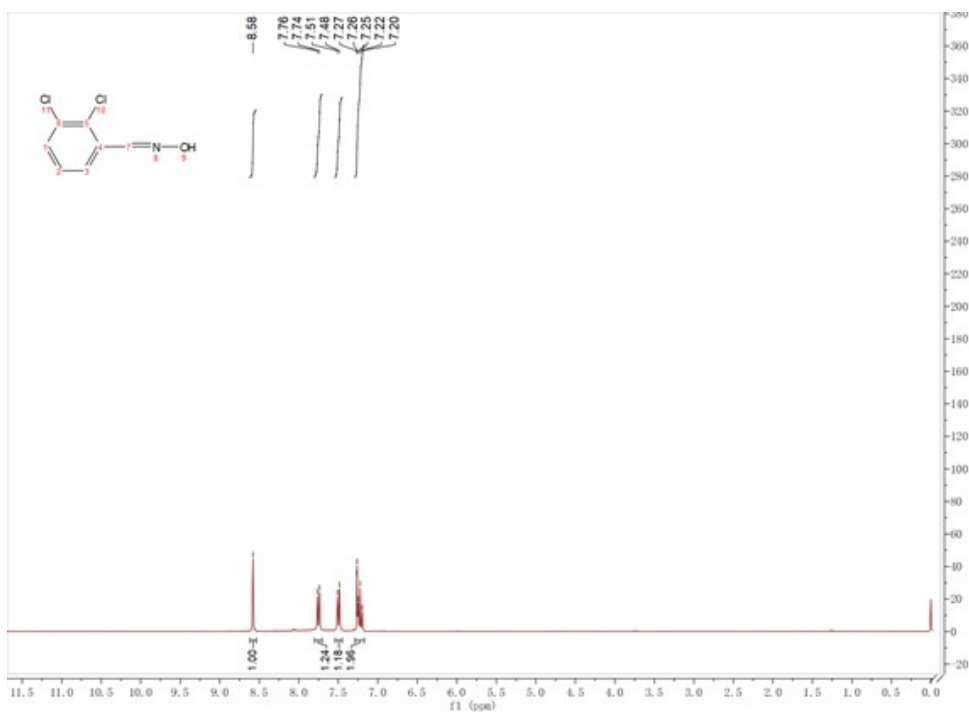

Figure S27 <sup>1</sup>H NMR spectra of 3A

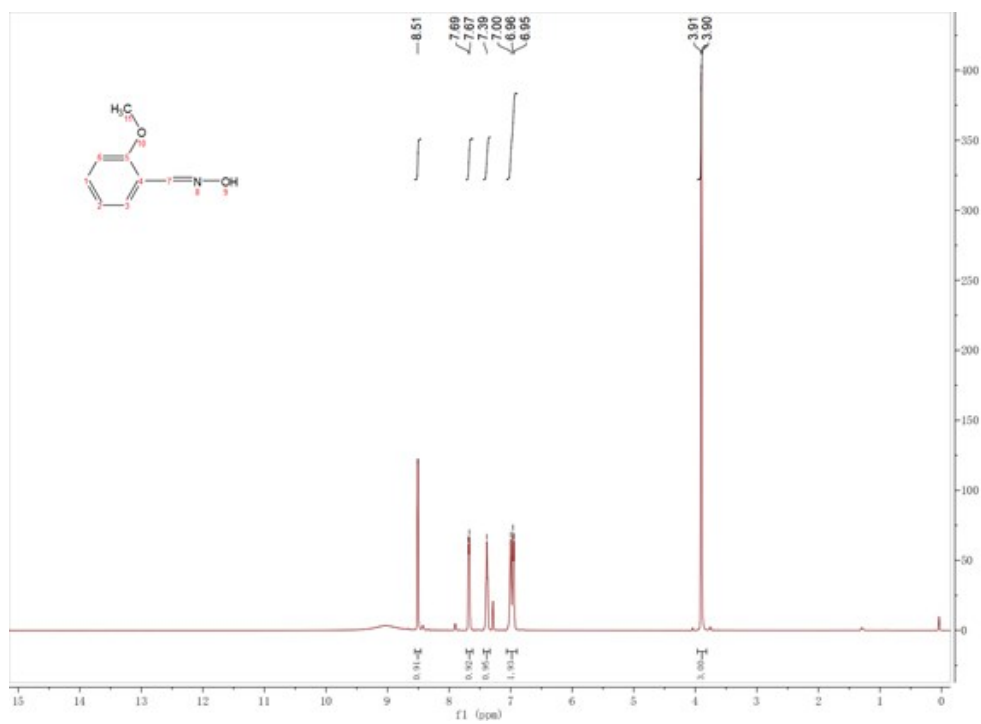

Figure S28 <sup>1</sup>H NMR spectra of 5A

### <sup>13</sup>C NMR spectra of compound 1b-25b.

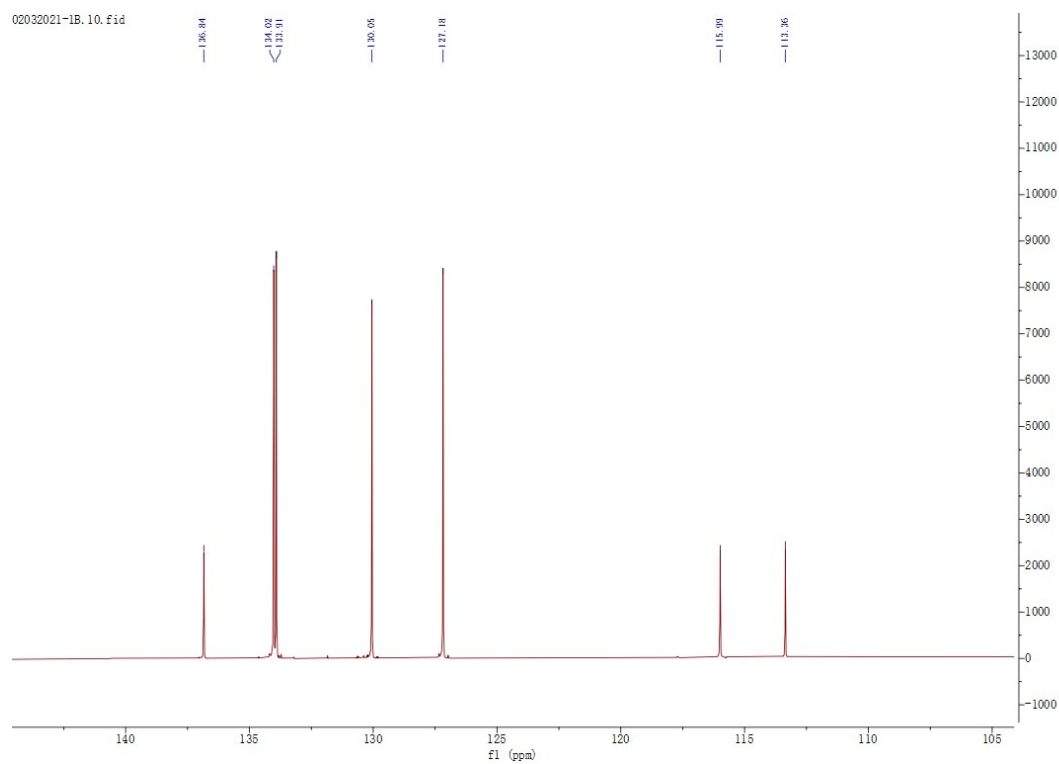

Figure S29 <sup>13</sup>C NMR spectra of compound 1b

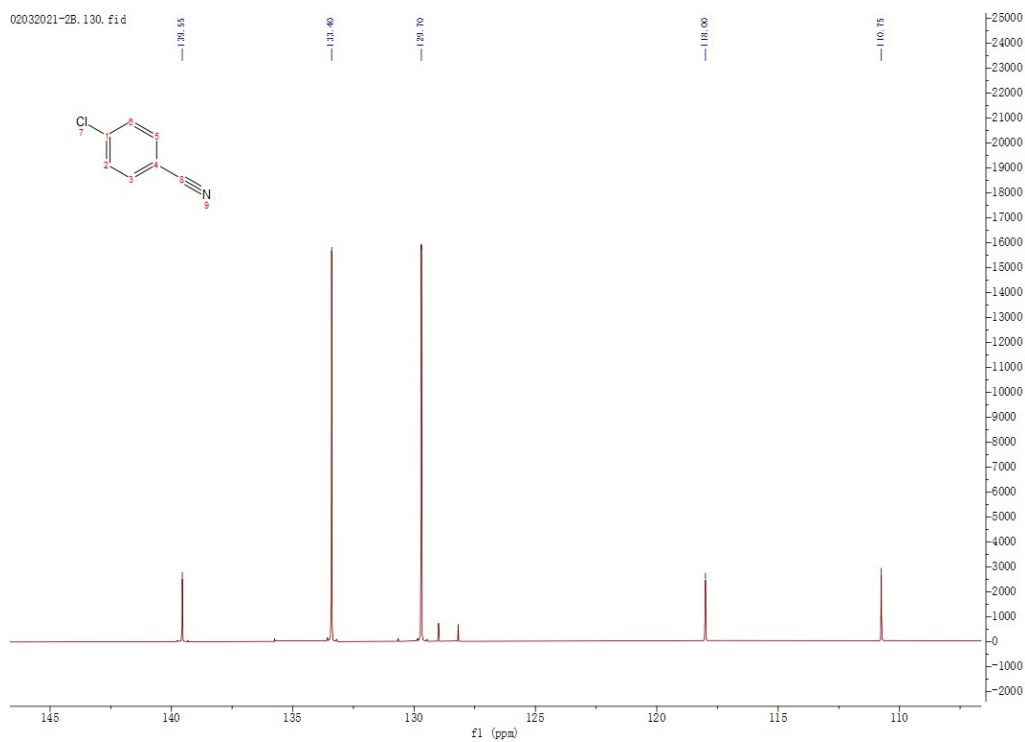

Figure S30 <sup>13</sup>C NMR spectra of compound 2b



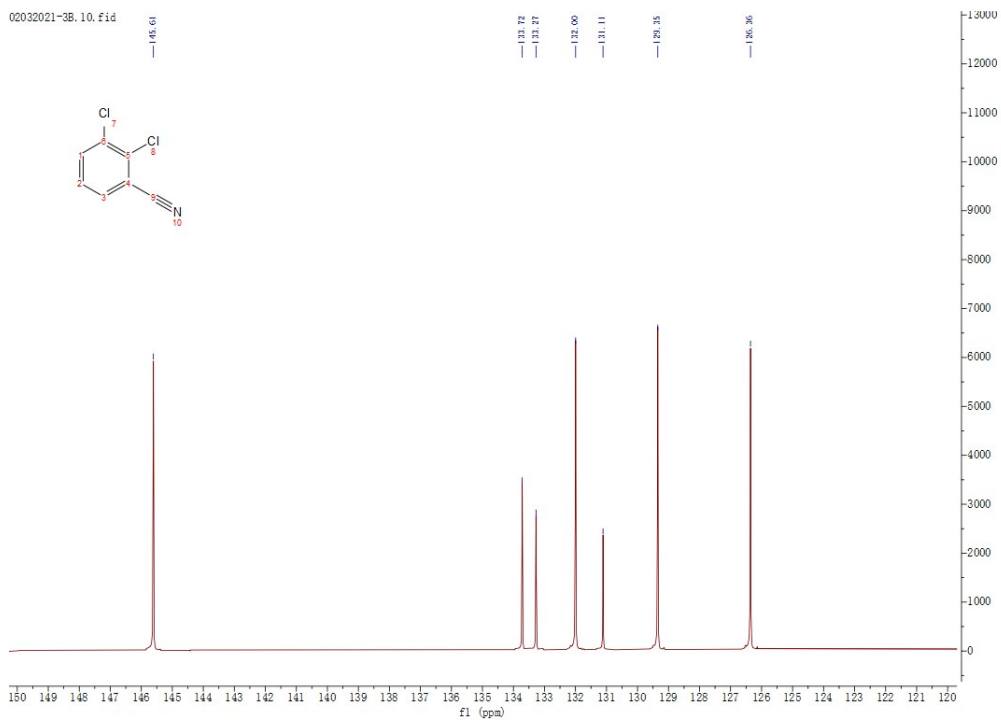

Figure S31  $^{13}\text{C}$  NMR spectra of compound 3b

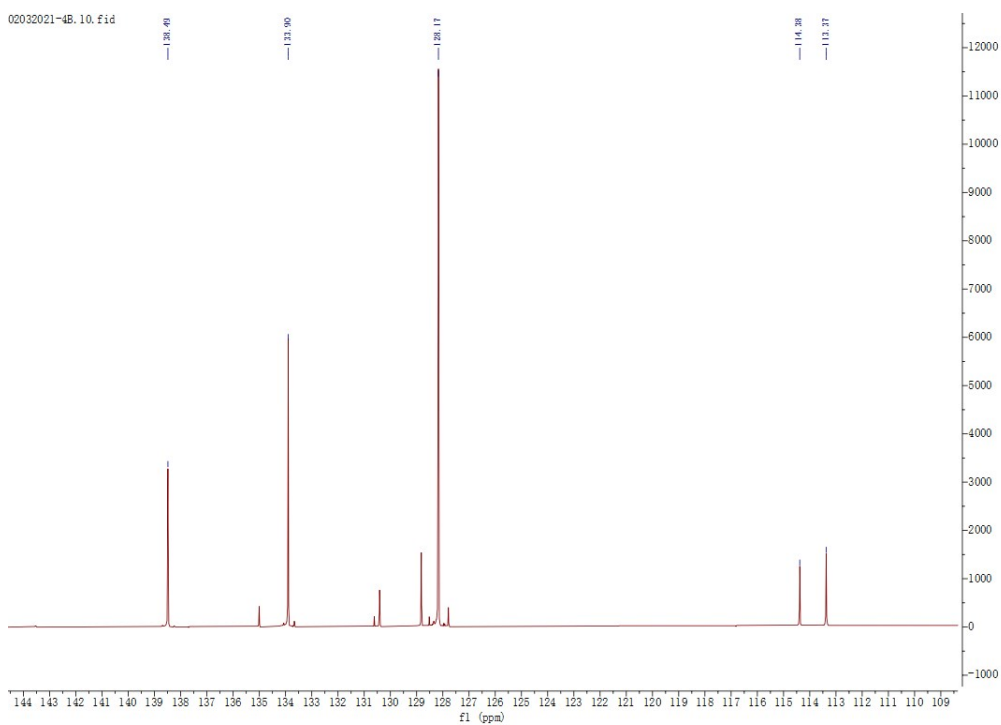

Figure S32  $^{13}\text{C}$  NMR spectra of compound 4b

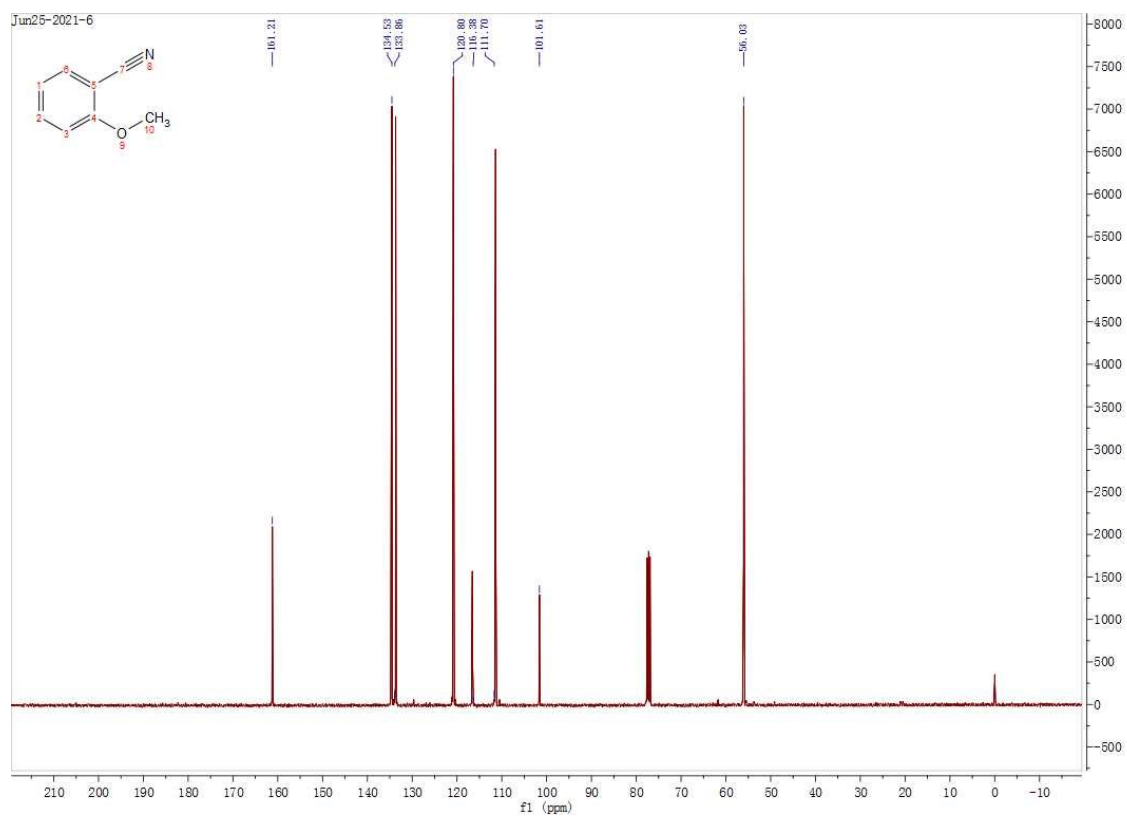

Figure S33  $^{13}\text{C}$  NMR spectra of compound 5b

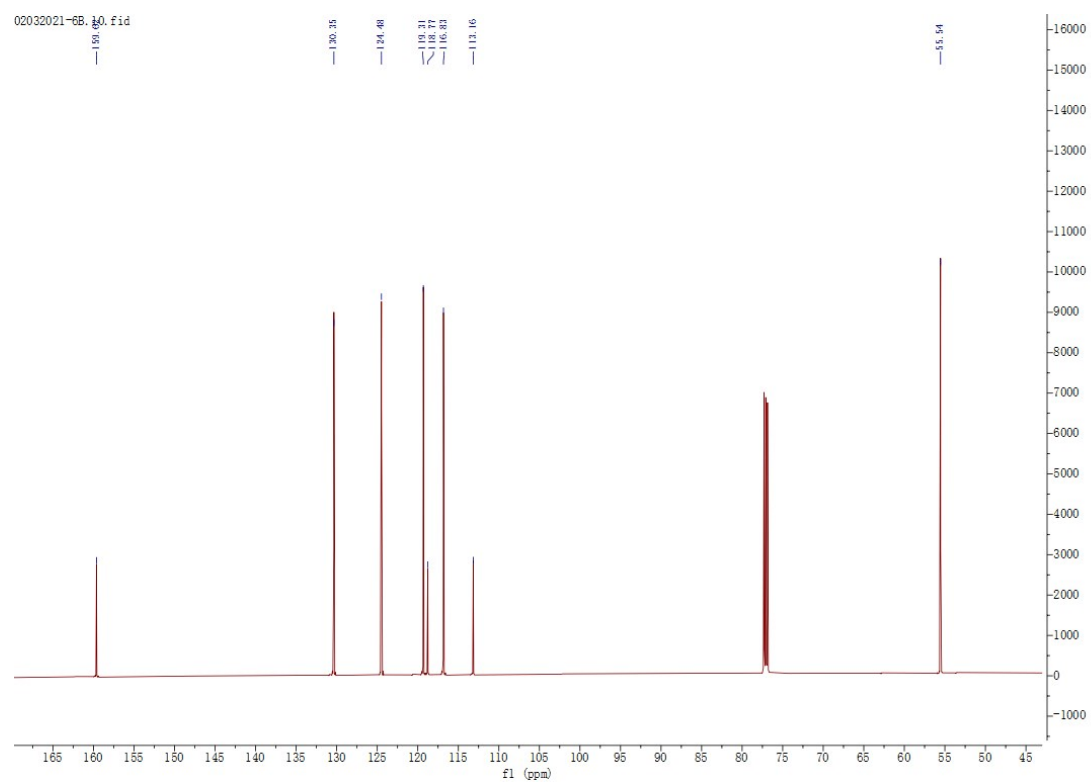

Figure S34  $^{13}\text{C}$  NMR spectra of compound 6b

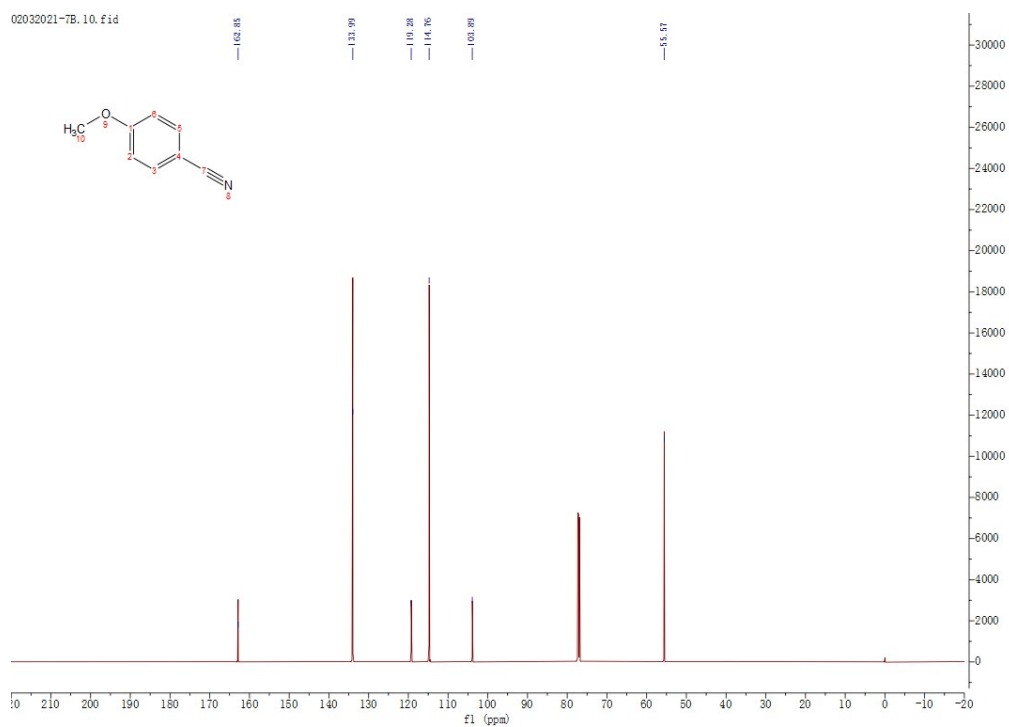

Figure S35  $^{13}\text{C}$  NMR spectra of compound 7b

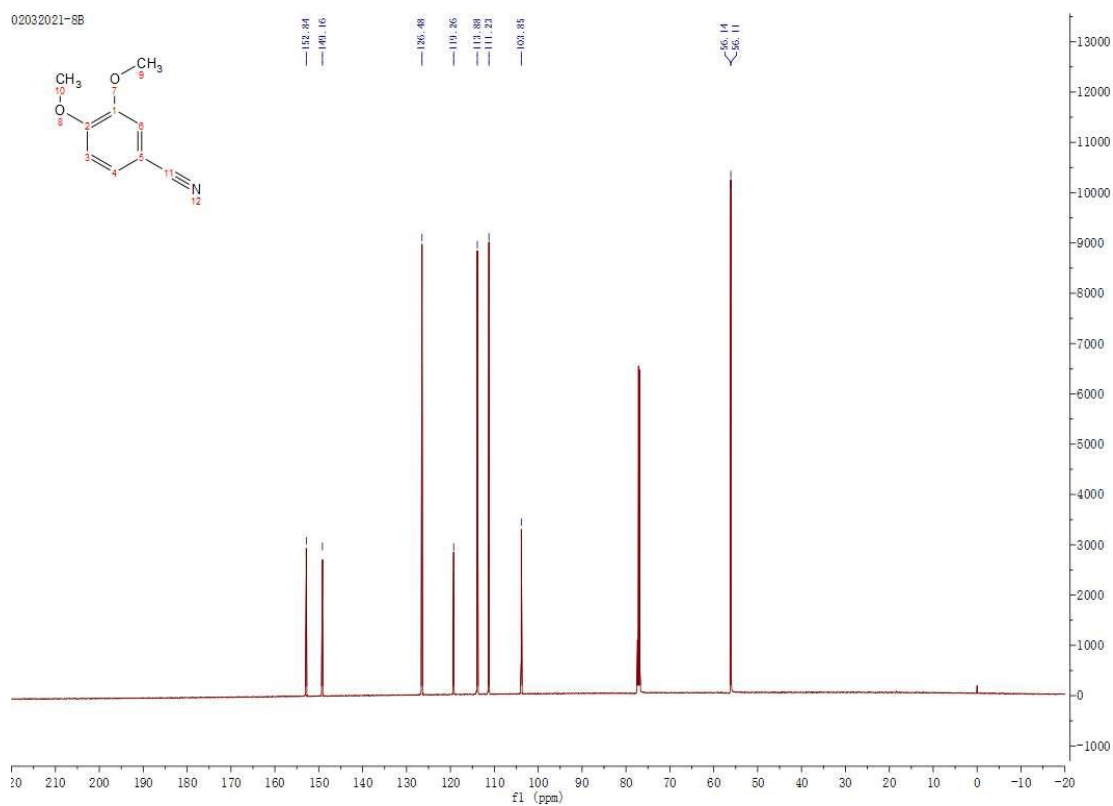

Figure S36  $^{13}\text{C}$  NMR spectra of compound 8b

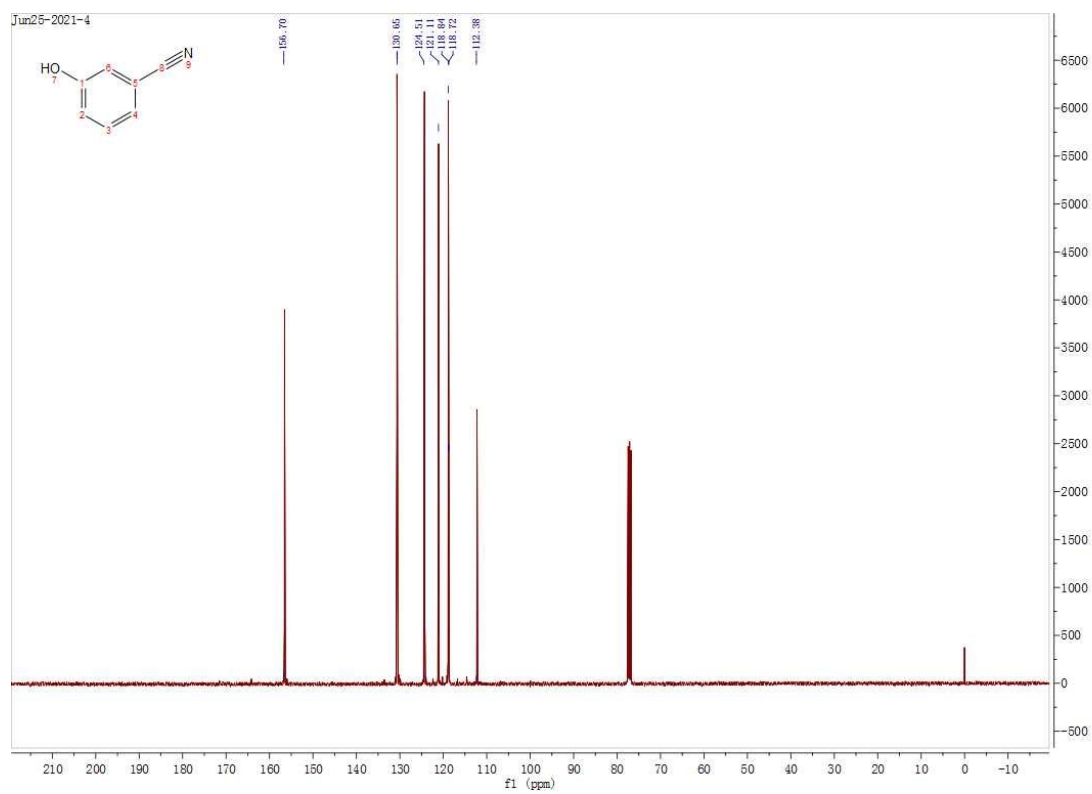

Figure S37  $^{13}\text{C}$  NMR spectra of compound 9b

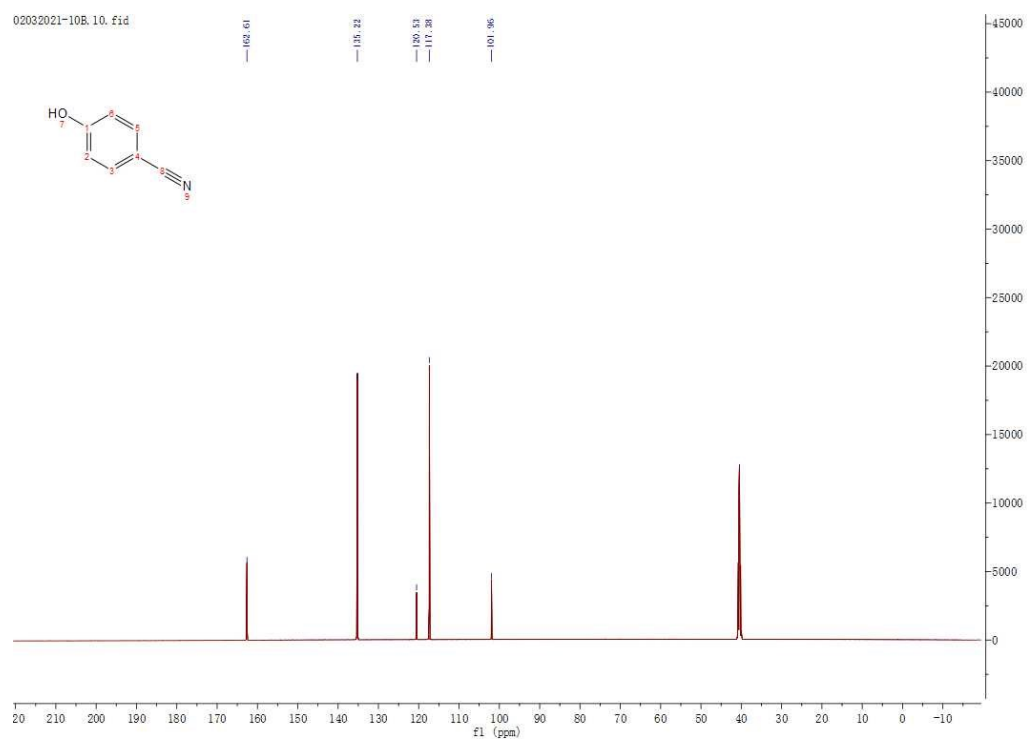

Figure S38  $^{13}\text{C}$  NMR spectra of compound 10b

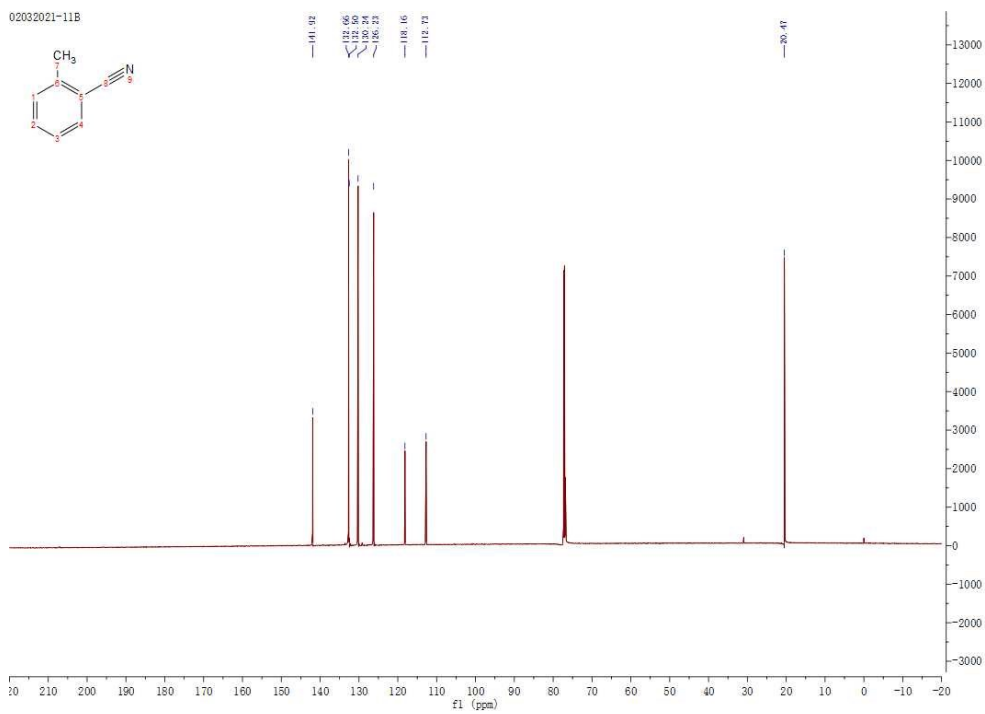

Figure S39 <sup>13</sup>C NMR spectra of compound 11b

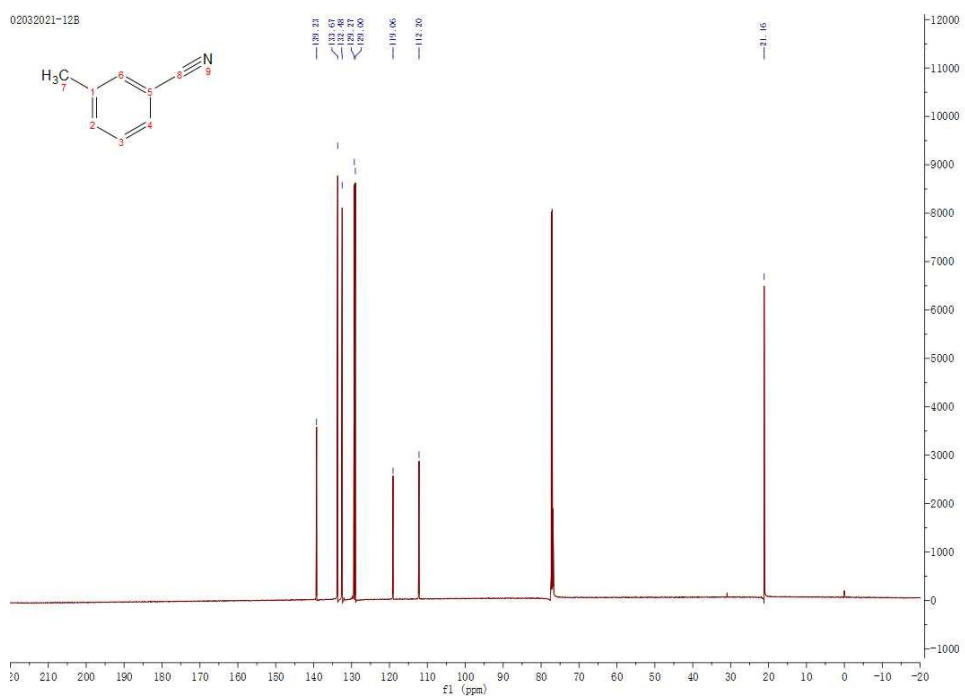

Figure S40 <sup>13</sup>C NMR spectra of compound 12b

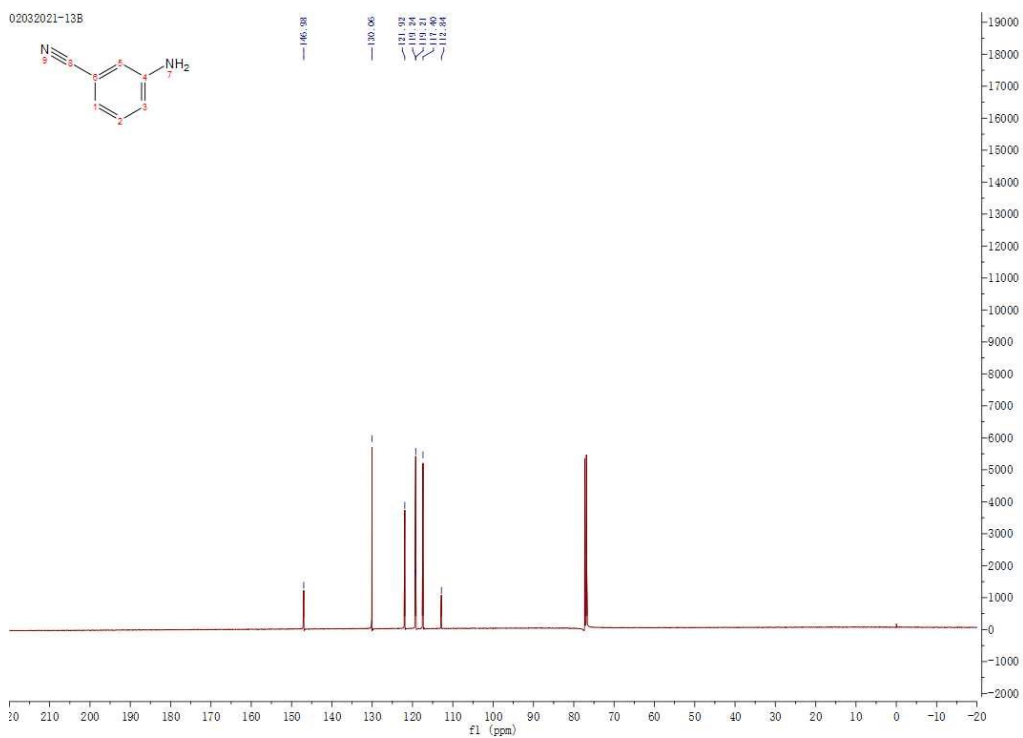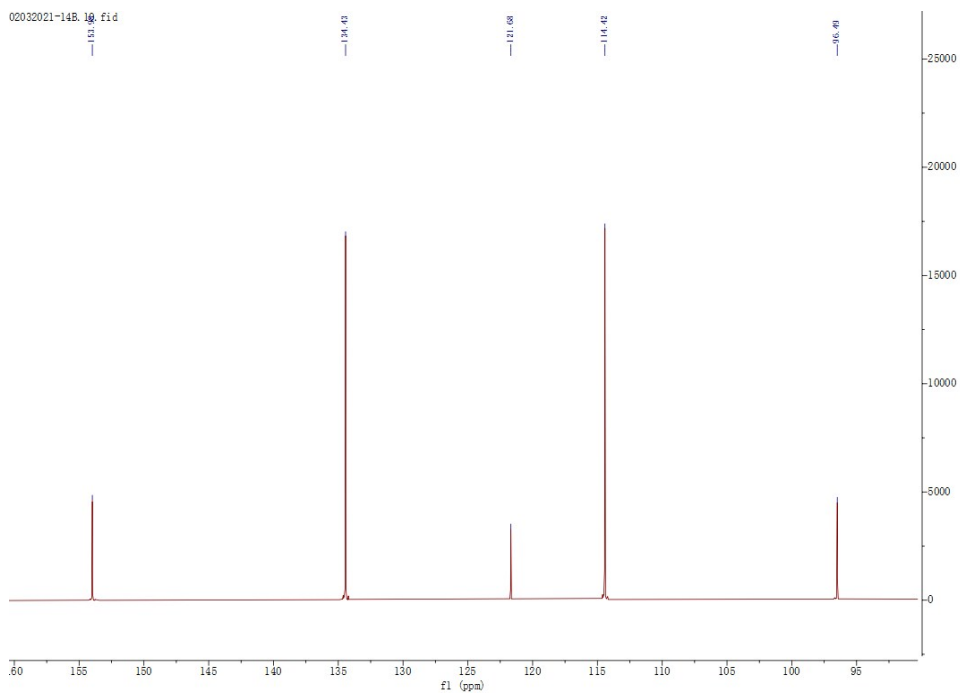

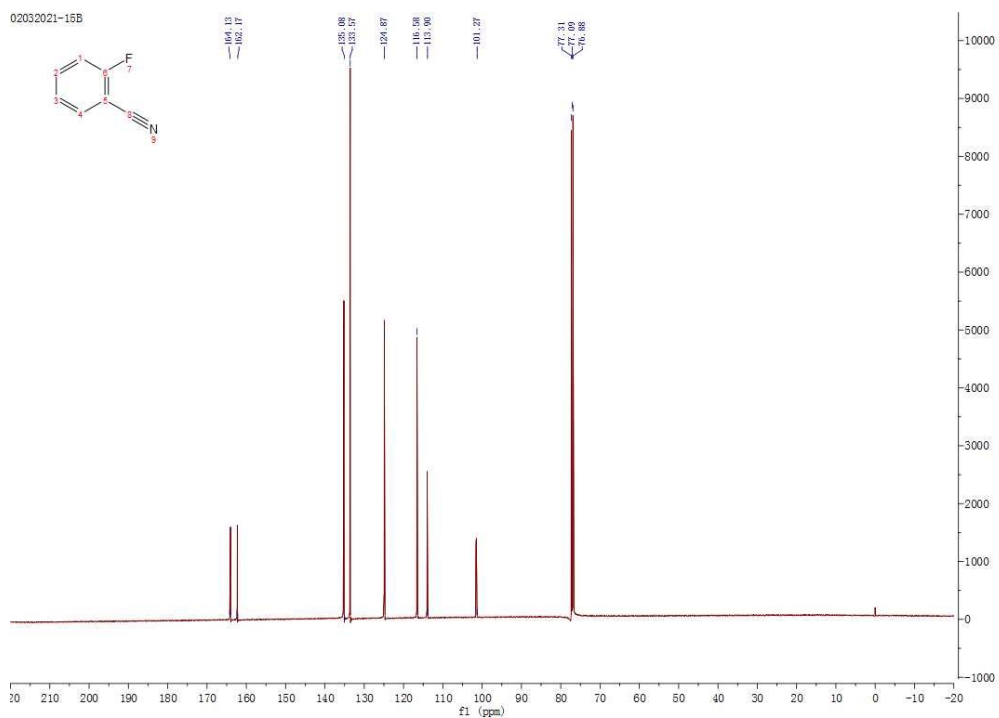

Figure S43  $^{13}\text{C}$  NMR spectra of compound 15b

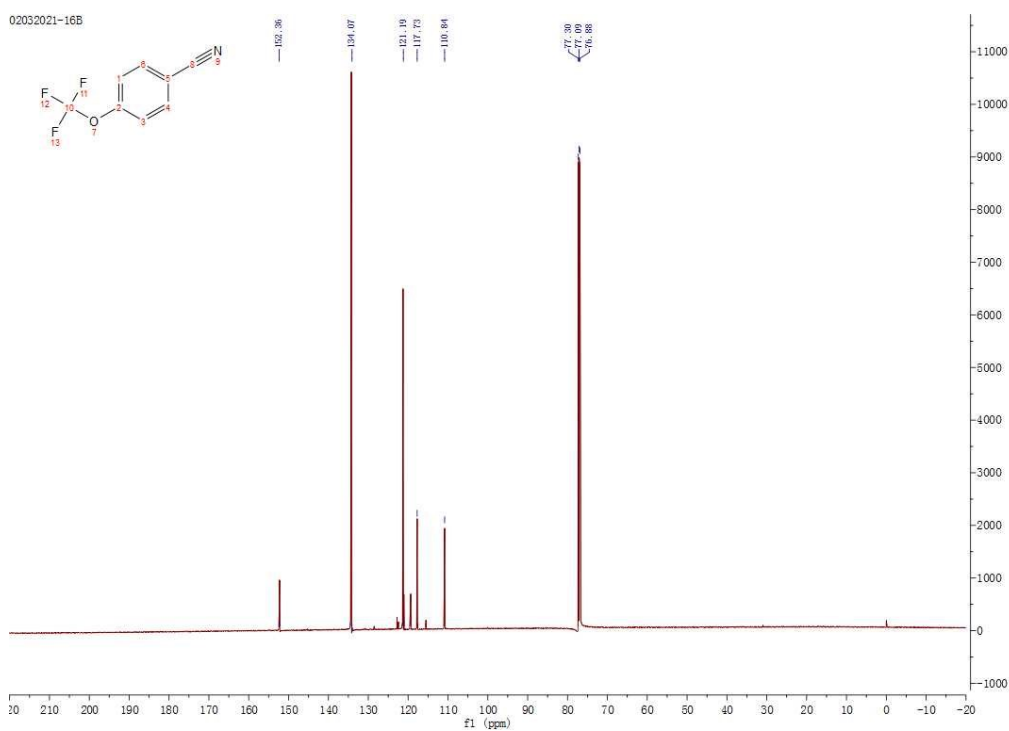

Figure S44  $^{13}\text{C}$  NMR spectra of compound 16b

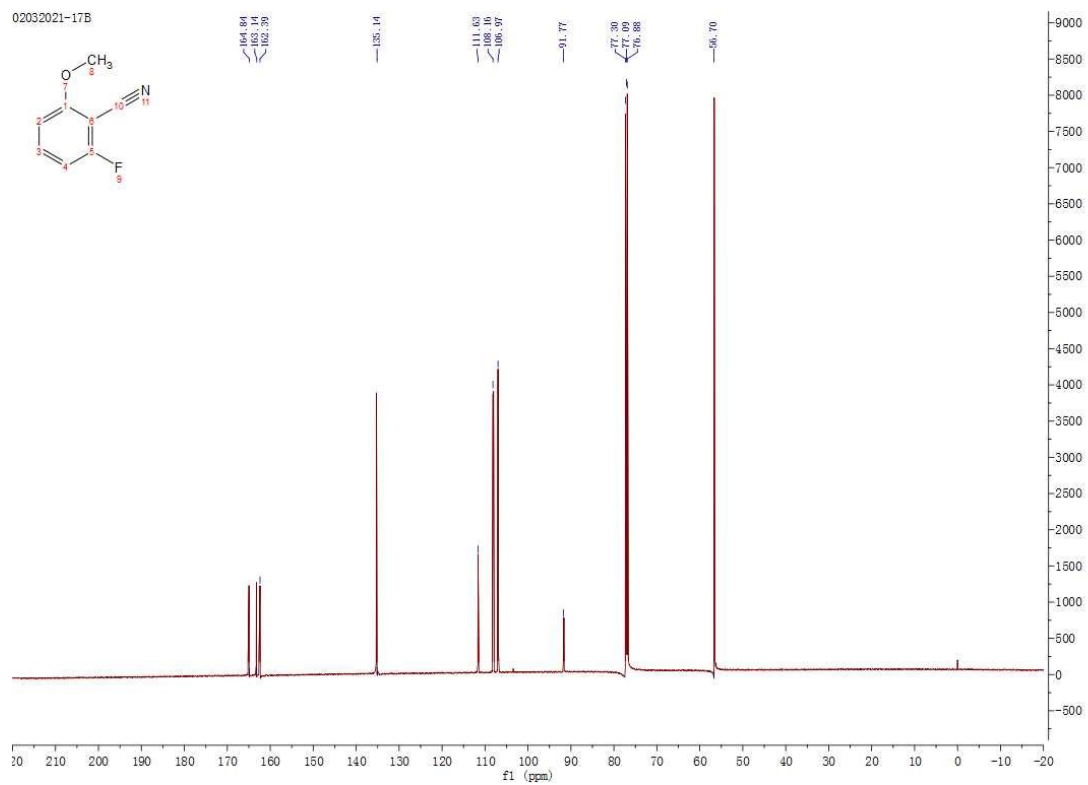

Figure S45  $^{13}\text{C}$  NMR spectra of compound 17b

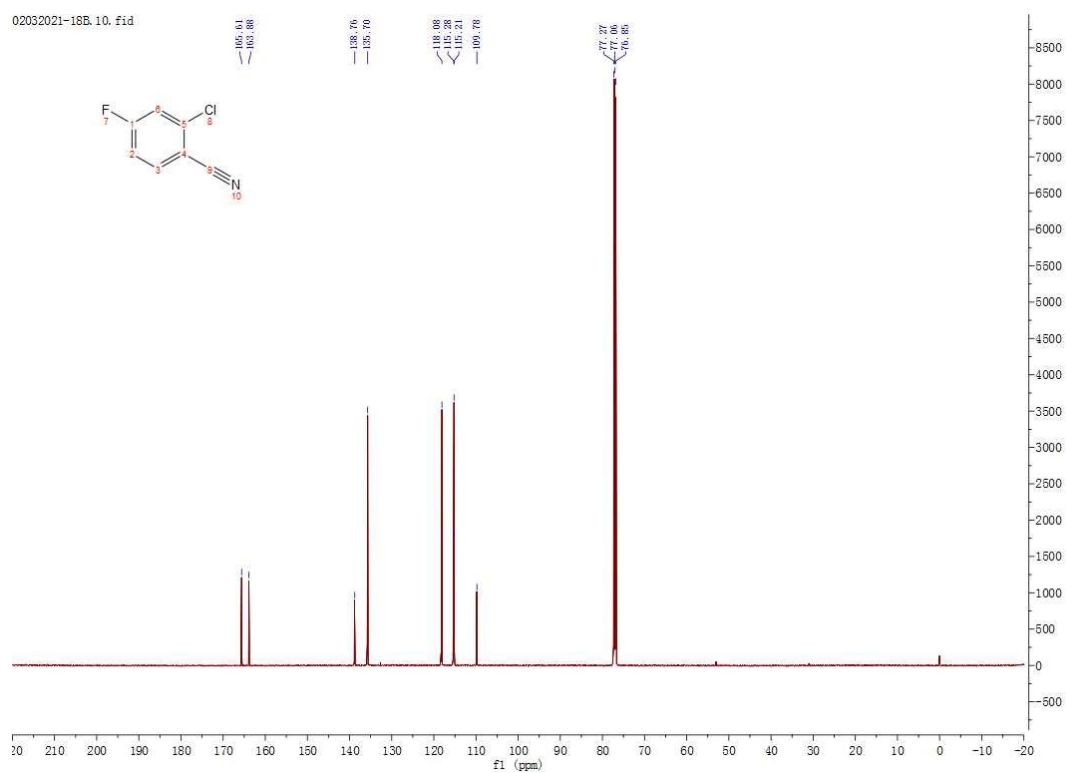

Figure S46  $^{13}\text{C}$  NMR spectra of compound 18b



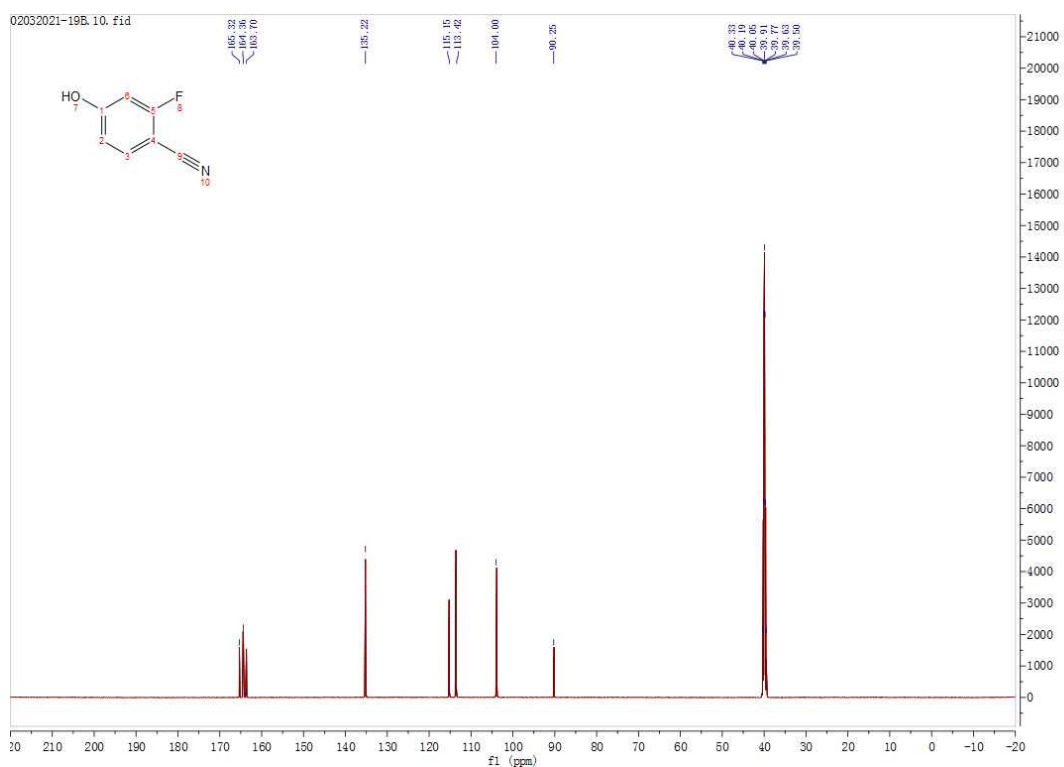

Figure S47  $^{13}\text{C}$  NMR spectra of compound 19b

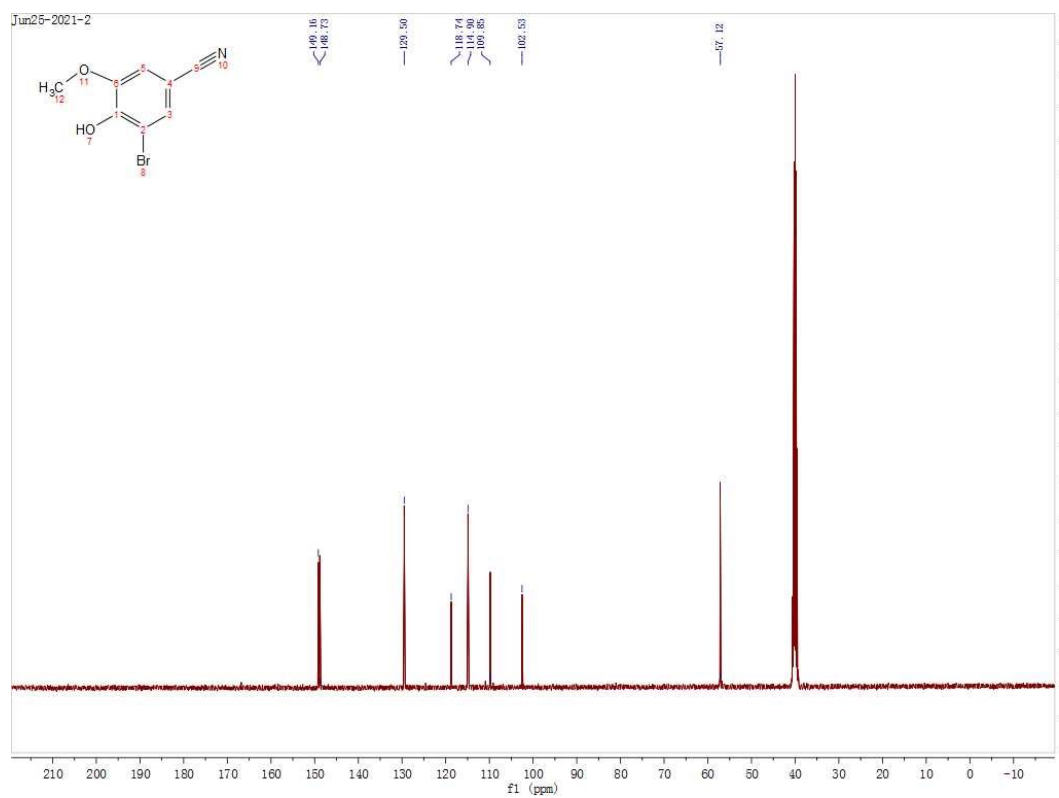

Figure S48  $^{13}\text{C}$  NMR spectra of compound 20b

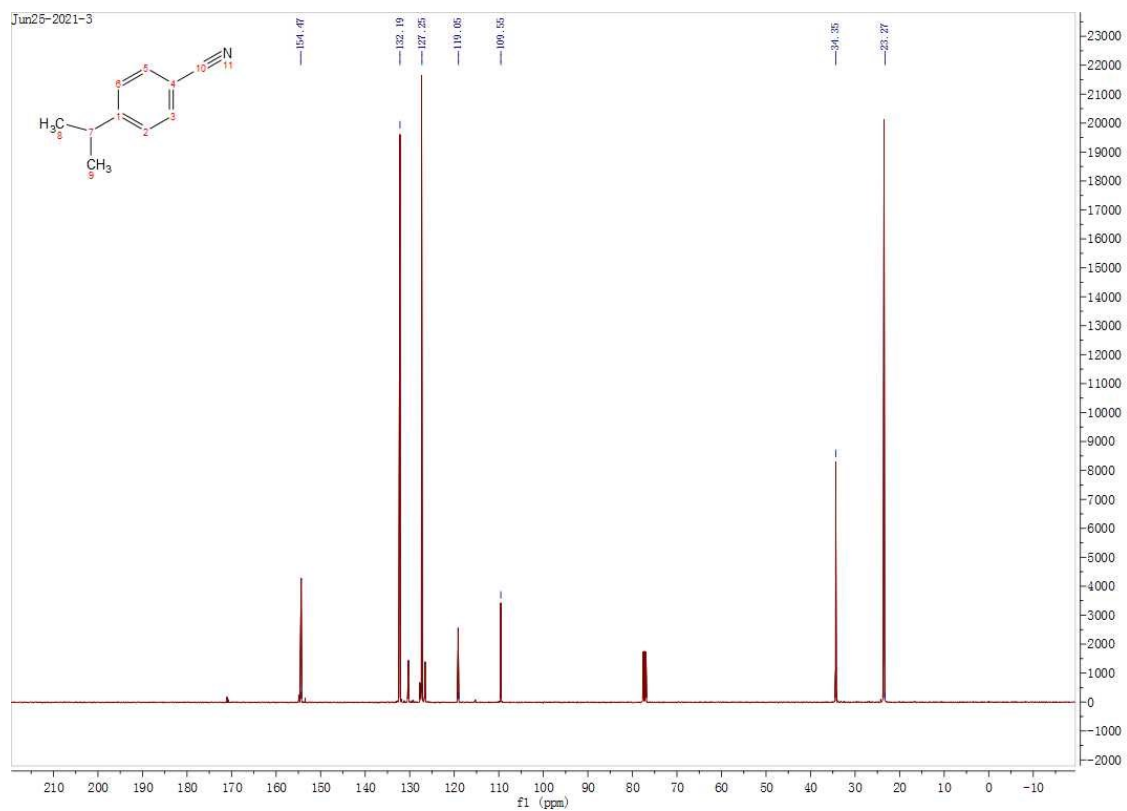

Figure S49  $^{13}\text{C}$  NMR spectra of compound 22b

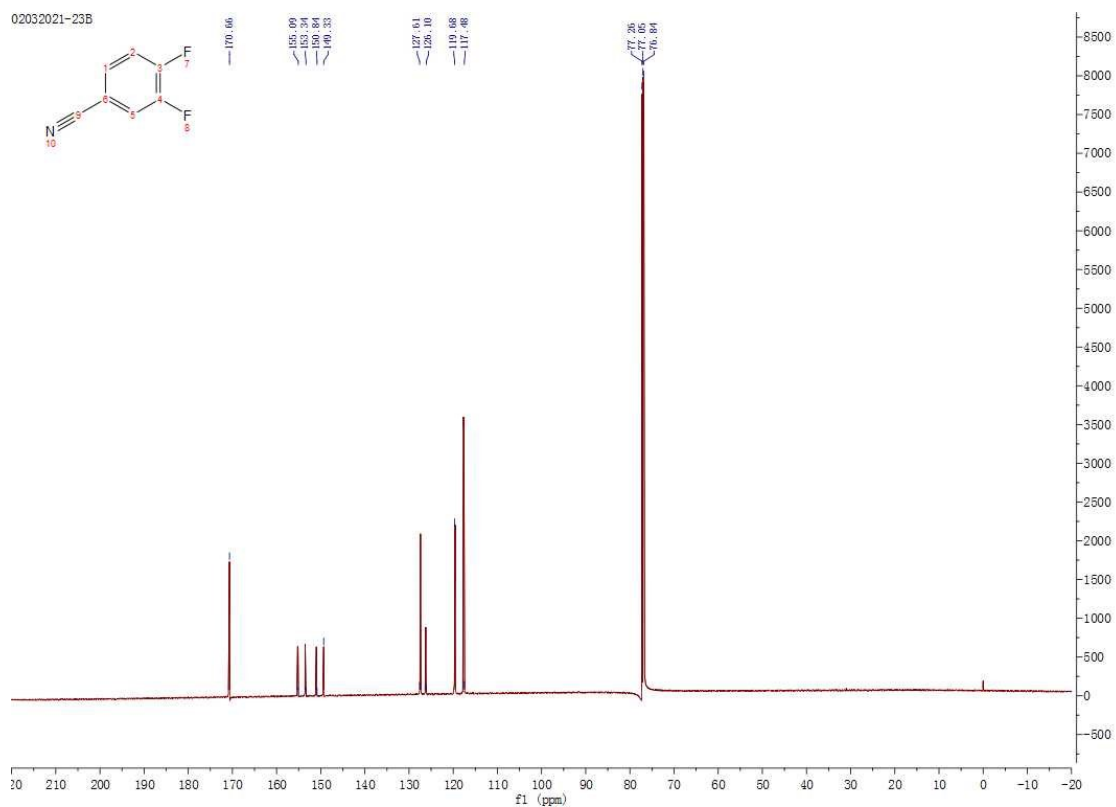

Figure S50  $^{13}\text{C}$  NMR spectra of compound 23b

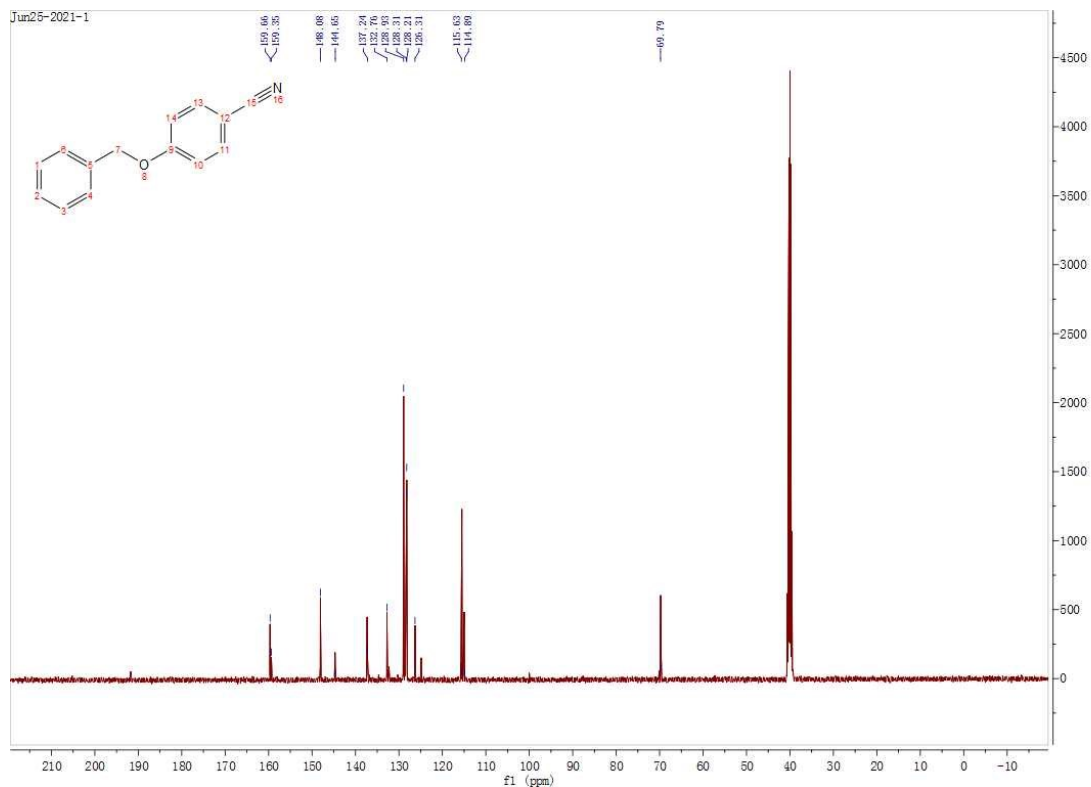

Figure S51  $^{13}\text{C}$  NMR spectra of compound 24b

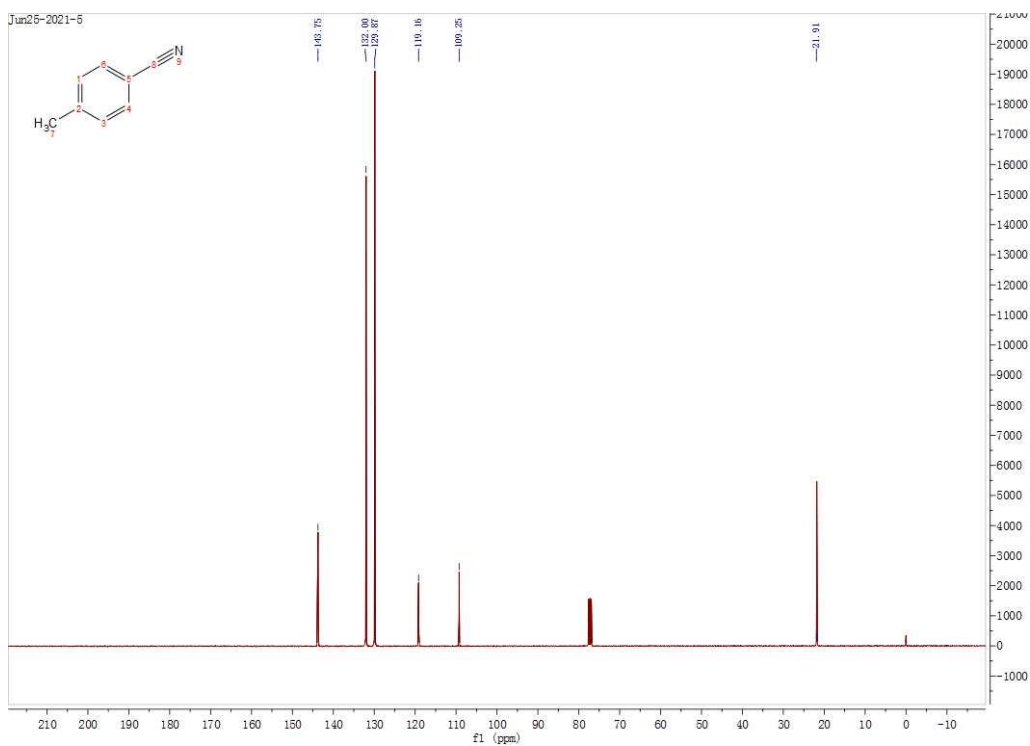

Figure S52  $^{13}\text{C}$  NMR spectra of compound 25b

**<sup>19</sup>F NMR spectra of compound 15b, 16b, 17b, 18b, 19b and 23b**

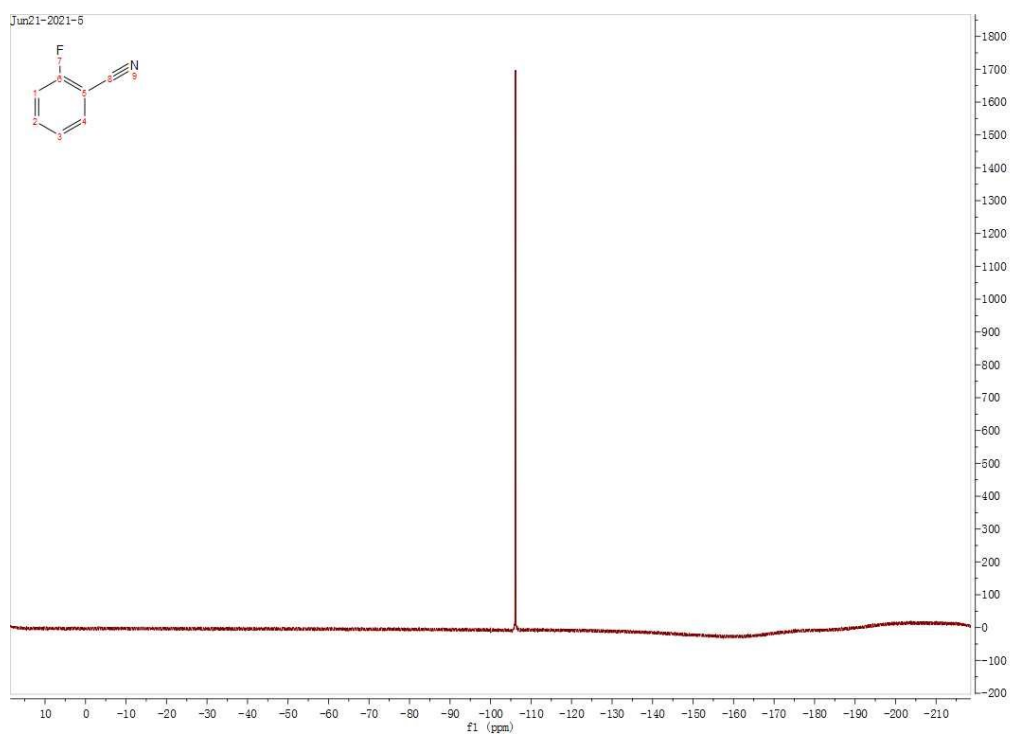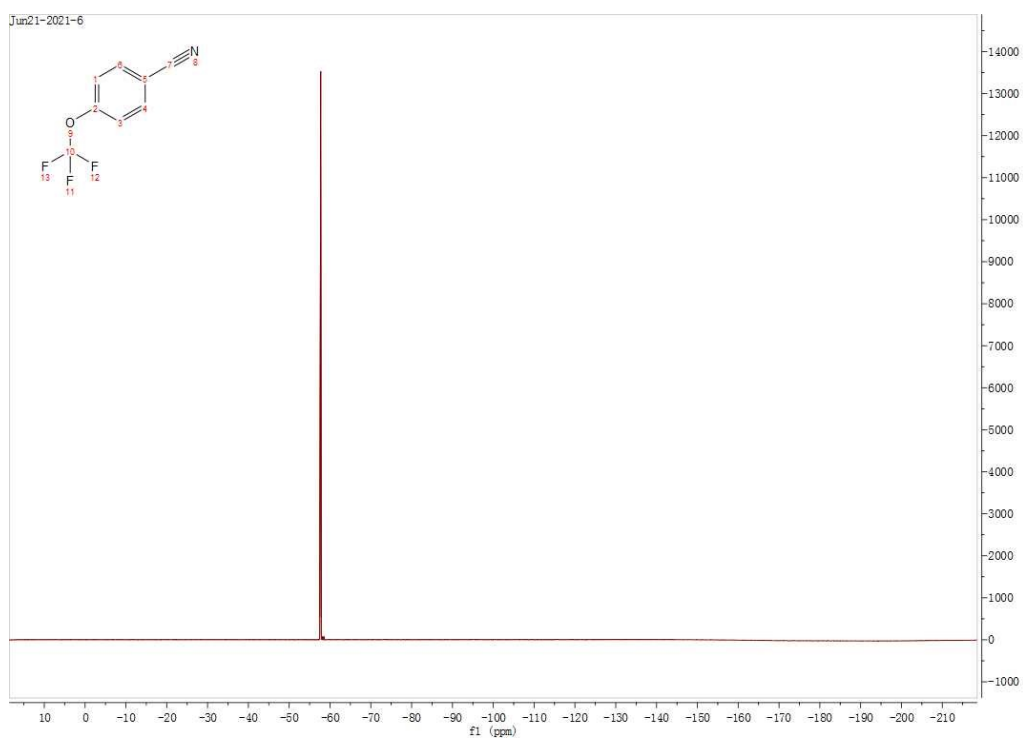

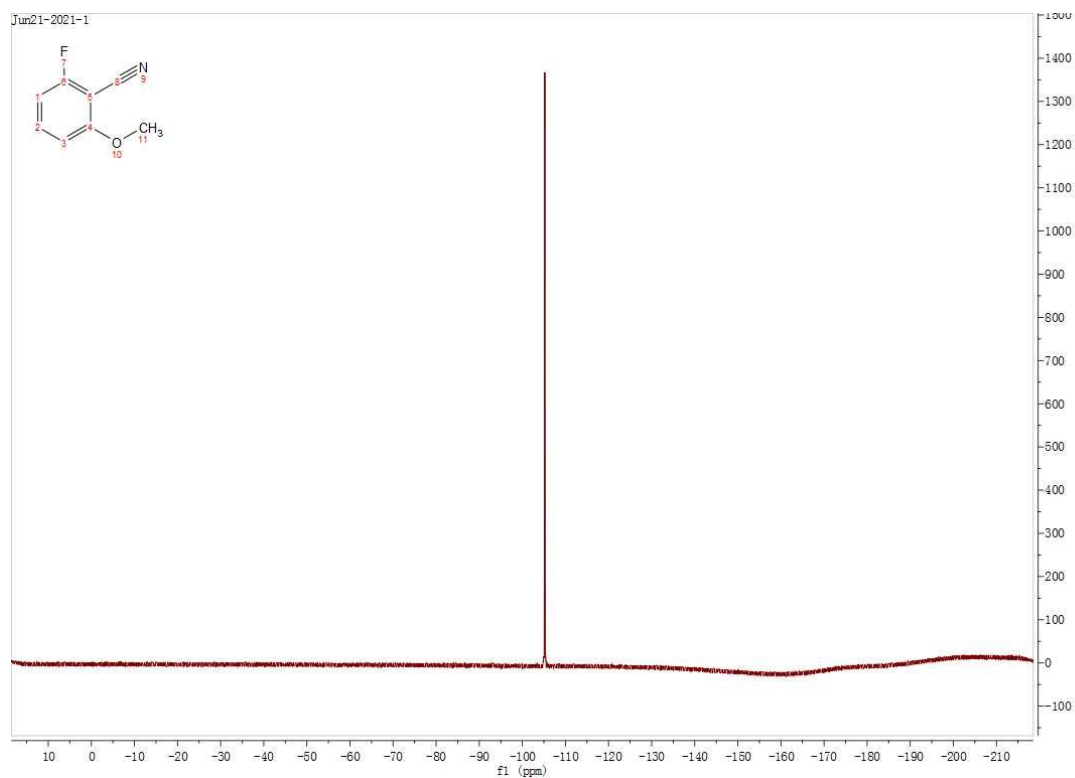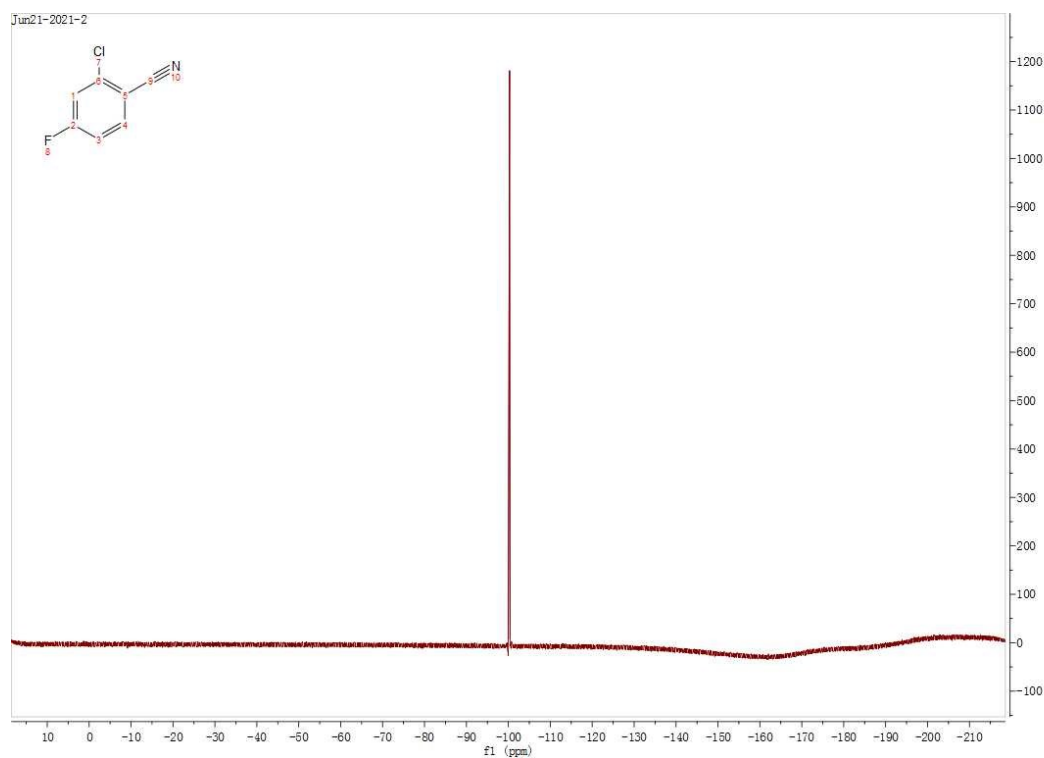

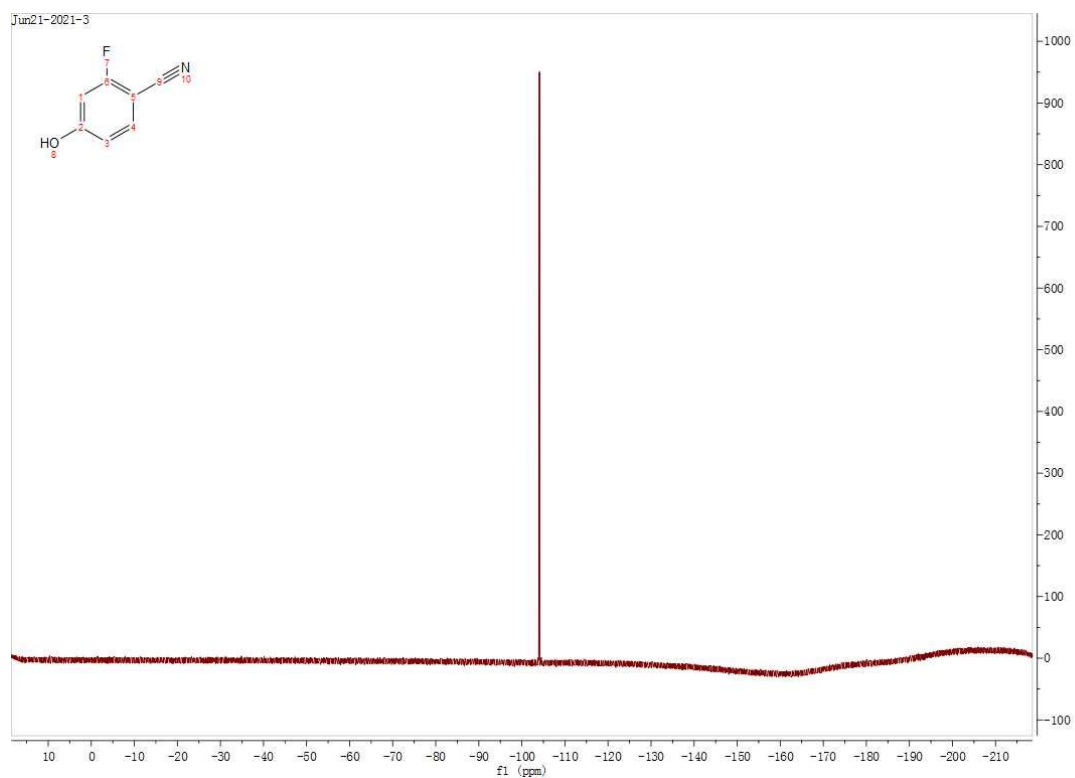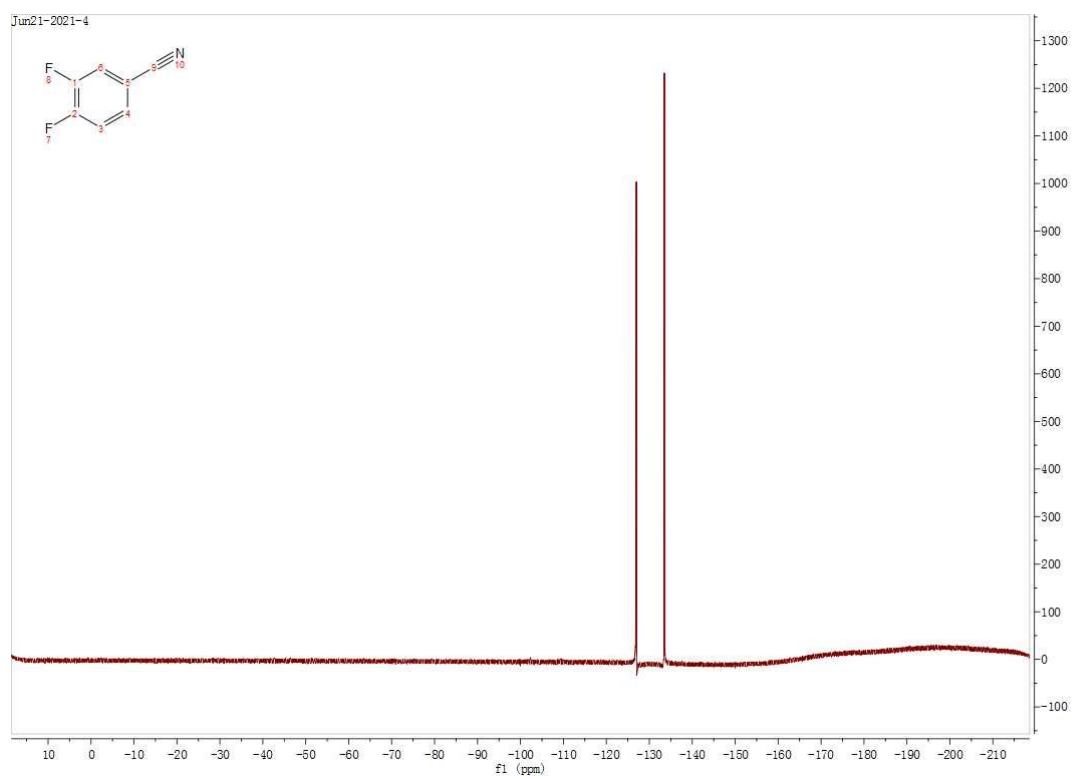

---

## Reference m.p. of compounds 1b-25b.

1b: 43-45°C<sup>1</sup>  
2b: 90-93 °C<sup>2</sup>/ 92-94 °C<sup>3</sup>/ 91.2-93.1 °C<sup>4</sup>  
3b: 60-61 °C<sup>5</sup>/56-57 °C<sup>6</sup>/51-53.5 °C<sup>7</sup>  
4b: 144-145 °C<sup>8</sup>/140-143 °C<sup>9</sup>/144-145 °C<sup>10</sup>  
5b: 59 °C<sup>2</sup>/21.5-22 °C (ethanol)<sup>11</sup>/24.5 °C<sup>12</sup>  
6b: 24-25 °C<sup>13</sup>/23 °C<sup>14</sup>  
7b: 58-59 °C<sup>15</sup>/55-57 °C<sup>16</sup>/59.2-60.4 °C<sup>4</sup>/56-58 °C<sup>17</sup>/59-60 °C<sup>18</sup>  
8b: 68.6-70.5 °C<sup>4</sup>/65-67 °C<sup>19</sup>/66-67 °C<sup>20</sup>/62-65 °C/65-66 °C<sup>21</sup>/64.9-66.4 °C<sup>22</sup>  
9b: 74.8-77.2 °C<sup>23</sup>/57-59.5 °C<sup>24</sup>/78-80 °C<sup>25</sup>/68 °C<sup>26</sup>/76-78 °C<sup>27</sup>  
10b: 110-113 °C<sup>28</sup>/111-112 °C<sup>29</sup>/109-111 °C<sup>30</sup>/108.8-110.2 °C<sup>23</sup>/100.7-103.2 °C<sup>24</sup>/107-109 °C<sup>31</sup>  
11b: liquid  
12b: liquid  
13b: 52-54 °C<sup>32</sup>/50-52 °C<sup>33</sup>/50-54 °C<sup>34</sup>  
14b: 83-85 °C<sup>34, 35</sup>/83-86 °C<sup>34</sup>/85-87 °C<sup>32</sup>/85-86 °C<sup>30</sup>  
15b: liquid  
16b: liquid  
17b: 93-95 °C<sup>36</sup>  
18b: 63.0-65.0 °C<sup>33</sup>  
19b: 124-125 °C<sup>25</sup>/123.5 °C<sup>37</sup>/117-118 °C<sup>38</sup>  
20b: 159-160 °C<sup>39</sup>/134-136 °C<sup>40</sup>/144 °C<sup>41</sup>  
21b: 179 °C<sup>42</sup>  
22b: liquid  
23b: 51-53 °C<sup>43</sup>  
24b: 86 °C<sup>44</sup>/91-93 °C<sup>45</sup>/86 °C<sup>46</sup>/86-88 °C<sup>47</sup>/97-99 °C<sup>21</sup>/93-94 °C<sup>48</sup>/96-98 °C<sup>49</sup>  
25b: 26-28 °C<sup>28</sup>/26 °C<sup>50</sup>/27-29 °C<sup>51</sup>/28-29 °C(patent)/26-27 °C<sup>52</sup>/27.1-27.7 °C<sup>53</sup>

## References:

1. Wang, L.; Shen, C.; Wang, H. P.; Zhou, W. Y.; Sun, F. A.; He, M. Y.; Chen, Q., Selective conversion of aldehydes into nitriles and primary amides in aqueous media. *J Chem Res* **2012**, (8): 460-462.
2. Patil, U. B.; Shendage, S. S.; Nagarkar, J. M., One-pot synthesis of nitriles from aldehydes catalyzed by deep eutectic solvent. *Synthesis-Stuttgart* **2013**, 45 (23): 3295-3299.
3. Miyagi, K.; Moriyama, K.; Togo, H., One-pot transformation of carboxylic acids into nitriles. *Eur J Org Chem* **2013**, 2013 (26): 5886-5892.
4. Xu, J. X.; Gao, Y.; Li, Z. J.; Liu, J. J.; Guo, T. F.; Zhang, L.; Wang, H. X.; Zhang, Z. H.; Guo, K., Chlorotropylium promoted conversions of oximes to amides and nitriles. *Eur J Org Chem* **2020**, 2020 (3): 311-315.
5. Meyer, M. D.; Altenbach, R. J.; Basha, F. Z.; Carroll, W. A.; Condon, S.; Elmore, S. W.; Kerwin, J. F.; Sippy, K. B.; Tietje, K.; Wendt, M. D.; Hancock, A. A.; Brune, M. E.; Buckner, S. A.; Drizin, I., Structure-activity studies for a novel series of tricyclic substituted hexahydrobenz[e]isoindole alpha (1A) adrenoceptor antagonists as potential agents for the symptomatic treatment of benign prostatic hyperplasia (BPH). *J Med Chem* **2000**, 43 (8): 1586-1603.

- 
6. Rahman, L. K. A.; Scrowston, R. M., 7-Substituted Benzo[B] Thiophenes and 1,2-Benzisothiazoles .2. Chloro and Nitro-Derivatives. *J Chem Soc Perk T I* **1984**, (3): 385-390.
  7. Zielinski, W.; Skibinski, A., Chlorination of ethylbenzene to dichloroethylbenzenes .1. analysis of reaction mixture composition. *Rocz Chem* **1975**, 49 (1): 143-150.
  8. Zhao, B.; Ren, Y. L.; Ren, F. P.; Tian, X. Z.; Zhao, S., Metal-free HNO<sub>3</sub> /TEMPO-catalyzed conversion of benzyl alcohols to aromatic nitriles with oxygen molecule as the terminal oxidant. *Lett Org Chem* **2018**, 15 (7): 627-632.
  9. Masjed, S. M.; Akhlaghinia, B.; Zarghani, M.; Razavi, N., Direct synthesis of nitriles from aldehydes and hydroxylamine hydrochloride catalyzed by a HAP@AEPH(2)-SO<sub>3</sub>H nanocatalyst. *Aust J Chem* **2017**, 70 (1): 33-43.
  10. Barbero, M.; Cadamuro, S.; Dughera, S., Copper-free Sandmeyer cyanation of arenediazonium o-benzenedisulfonimides. *Org Biomol Chem* **2016**, 14 (4): 1437-1441.
  11. Lees, W. A.; Burawoy, A., The effect of hydrogen bonding on the electronic spectra of organic molecules. *Tetrahedron* **1963**, 19 (3): 419-438.
  12. Ringer, W. E., B. Préparation de l'ortho-oxyméthyl (éthyl)-benzonnitrile. *Recueil des Travaux Chimiques des Pays-Bas et de la Belgique* **1899**, 18 (8): 330-333.
  13. Chatupheeraphat, A.; Liao, H.-H.; Lee, S.-C.; Rueping, M., Nickel-catalyzed C–CN bond formation via decarbonylative cyanation of esters, amides, and intramolecular recombination fragment coupling of acyl cyanides. *Org Lett* **2017**, 19 (16): 4255-4258.
  14. Exner, O.; Kováč, Š; Solčániová, E., Substituent effects in infrared spectroscopy. II. Characteristic frequencies of the nitro group in meta- and para-substituted nitrobenzenes. *Collect Czech Chem C* **1972**, 37 (7): 2156-2168.
  15. Tsuchiya, D.; Kawagoe, Y.; Moriyama, K.; Togo, H., Direct oxidative conversion of methylarenes into aromatic nitriles. *Org Lett* **2013**, 15 (16): 4194-4197.
  16. Lamani, M.; Devadig, P.; Prabhu, K. R., A non-metal catalysed oxidation of primary azides to nitriles at ambient temperature. *Org Biomol Chem* **2012**, 10 (14): 2753-2759.
  17. Kalkhambkar, R. G.; Bunge, S. D.; Laali, K. K., Reaction of triflyl-imidazole with aldoximes: facile synthesis of nitriles and formation of novel aldoxime-bis(N-triflyl)-imidazole adducts. *Tetrahedron Lett* **2011**, 52 (40): 5184-5187.
  18. Kiss, Á.; Hell, Z., Heterogeneous catalytic method for the conversion of aldoximes into nitriles using molecular sieve modified with Copper(II). *Synth Commun* **2013**, 43 (13): 1778-1786.
  19. Meng, H.; Gao, S.; Luo, M. M.; Zeng, X. M., Iron and phenol Co-catalysis for rapid synthesis of nitriles under mild conditions. *Eur J Org Chem* **2019**, 2019 (28): 4617-4623.
  20. Ma, X. Y.; He, D. Q.; Chen, Z. J., Cu(OAc)<sub>2</sub>/malononitrile/water: a simple reaction system for synthesis of aromatic nitriles from aldoximes. *J Chem Res* **2018**, (12): 595-597.
  21. Zhu, Y.; Li, L.; Shen, Z., Cu-catalyzed cyanation of arylboronic acids with acetonitrile: a dual role of TEMPO. *Chem –Eur J* **2015**, 21 (38): 13246-13252.
  22. Fang, C.; Li, M.; Hu, X.; Mo, W.; Hu, B.; Sun, N.; Jin, L.; Shen, Z., A practical iodine-catalyzed oxidative conversion of aldehydes to nitriles. *RSC Adv* **2017**, 7 (3): 1484-1489.
  23. Reeta; Rangarajan, T. M.; Kaushik, K.; Singh, R. P.; Singh, M.; Singh, R. P., Efficient solvent- and temperature-tuned access to aldoxime ethers and phenolic functions by Pd-catalyzed C–O cross-coupling of aldoximes with aryl bromides and bromo-chalcones. *New J Chem* **2020**, 44 (4): 1326-1336.



- 
24. Zu, W.; Day, C.; Wei, L.; Jia, X.; Xu, L., Dual aminoquinolate diarylboron and nickel catalysed metallaphotoredox platform for carbon–oxygen bond construction. *Chem Comm* **2020**, *56* (59): 8273-8276.
  25. Zhang, X.; Wu, G.; Gao, W.; Ding, J.; Huang, X.; Liu, M.; Wu, H., Synergistic photo-copper-catalyzed hydroxylation of (hetero)aryl halides with molecular oxygen. *Org Lett* **2018**, *20* (3): 708-711.
  26. Kumar, I.; Sharma, R.; Kumar, R.; Kumar, R.; Sharma, U., C70 Fullerene-catalyzed metal-free photocatalytic ipso-hydroxylation of aryl boronic acids: synthesis of phenols. *Adv Synth Catal* **2018**, *360* (10): 2013-2019.
  27. Xie, H. Y.; Han, L. S.; Huang, S.; Lei, X.; Cheng, Y.; Zhao, W.; Sun, H.; Wen, X.; Xu, Q. L., N-substituted 3(10H)-acridones as visible-light, water-soluble photocatalysts: aerobic oxidative hydroxylation of arylboronic acids. *J Org Chem* **2017**, *82* (10): 5236-5241.
  28. Heydari, S.; Habibi, D.; Reza Faraji, A.; Keypour, H.; Mahmoudabadi, M., An overview on the progress and development on the palladium catalyzed direct cyanation. *Inorg Chim Acta* **2021**, *514*: 119956.
  29. Habibi, D.; Heydari, S.; Nasrollahzadeh, M., Synthesis of aryl nitriles using the stable aryl diazonium silica sulfates. *J Chem Res* **2012**, (10): 573-574.
  30. Wen, Q.; Jin, J.; Mei, Y.; Lu, P.; Wang, Y., Copper-mediated cyanation of aryl halides by activation of benzyl cyanide as the cyanide source. *Eur J Org Chem* **2013**, *2013* (19): 4032-4036.
  31. Uludag, N., An efficient synthesis of nitriles from aldoximes in the presence of trifluoromethanesulfonic anhydride in mild conditions. *Russ J Org Chem* **2020**, *56* (9): 1640-1645.
  32. Niknam, E.; Panahi, F.; Khalafi-Nezhad, A., Palladium-catalyzed cyanation of aryl halides using formamide and cyanuric chloride as a new “CN” source. *Eur J Org Chem* **2020**, *2020* (18): 2699-2707.
  33. Rajendra, M. A.; Sunil, K.; Sajith, A. M.; Joy, M. N.; Bakulev, V. A.; Haridas, K. R., Palladium-Catalyzed Cyanation under Mild Conditions: A case study to discover appropriate substrates among halides and pseudohalides. *Synlett* **2020**, *31* (16): 1629-1633.
  34. Chen, D.; Zhou, Y.; Zhou, H.; Liu, S.; Liu, Q.; Zhang, K.; Uozumi, Y., Metal-free Reduction of Nitro Aromatics to Amines with B<sub>2</sub>(OH)<sub>4</sub>/H<sub>2</sub>O. *Synlett* **2018**, *29* (13): 1765-1768.
  35. Yu, J.; Wang, Y.; Zhang, P.; Wu, J., Direct amination of phenols under metal-free conditions. *Synlett* **2013**, *24* (11): 1448-1454.
  36. Hynes, J. B.; Pathak, A.; Panes, C. H.; Okeke, C. C., Direct synthesis of 2,4-diaminoquinazolines from 2-fluorobenzonitriles. *J Heter Chem* **1988**, *25* (4): 1173-1177.
  37. Sasaki, M.; Takeuchi, K.; Sat, H.; Takatsu, H., Synthesis and Some Properties of 3-Fluoro-4-Cyanophenyl 4'-n-alkylbenzoates. *Mol Cryst Liq Cryst* **1984**, *109* (2-4): 169-178.
  38. Kelly, S. M., The synthesis and transition temperatures of benzoate ester derivatives of 2-fluoro-4-hydroxy-and 3-fluoro-4-hydroxybenzonitriles. *Helv Chim Acta* **1984**, *67* (6): 1572-1579.
  39. Gao, H.; Su, P.; Shi, Y.; Shen, X.; Zhang, Y.; Dong, J.; Zhang, J., Discovery of novel VEGFR-2 inhibitors. Part II: Biphenyl urea incorporated with salicylaldoxime. *Eur J Med Chem* **2015**, *90*: 232-240.
  40. Vowinkel, E.; Bartel, J., Ein eintopfverfahren zur Überführung von aldehyden in nitrile. *Chem Ber* **1974**, *107* (4): 1221-1227.

- 
41. Misani, F.; Bogert, M. T., The search for superior drugs for tropical diseases. II. Synthetic studies in the quinoline and phenan-throline series. Skraup and conrad-limpach-knorr reactions. *J Org Chem* **1945**, *10* (4): 347-365.
  42. Raiford, L. C.; Hilman, G. C., New derivatives of vanillin and some of their reactions. *J Am Chem Soc* **1927**, *49*: 1571-1577.
  43. Naoto, Y.; Hiroshi, S.; Yasuo, Y.; Osamu, F.; Yoshikazu, K., Tetraphenylphosphonium bromide catalyzed fluorodenitrations and fluorodesulfonylations. efficient syntheses of m-fluoroaromatic compounds. *Chem Lett* **1989**, *18* (12): 2213-2216.
  44. Shigeno, M.; Hayashi, K.; Nozawa-Kumada, K.; Kondo, Y., Phosphazene base tBu-P4 catalyzed methoxy-alkoxy exchange reaction on (hetero)arenes. *Chem-Eur J* **2019**, *25* (24): 6077-6081.
  45. Fang, W. Y.; Qin, H. L., Cascade process for direct transformation of aldehydes (RCHO) to nitriles (RCN) using inorganic reagents NH<sub>2</sub>OH/Na<sub>2</sub>CO<sub>3</sub>/SO<sub>2</sub>F<sub>2</sub> in DMSO. *J Org Chem* **2019**, *84* (9): 5803-5812.
  46. Wu, Q.; Luo, Y.; Lei, A.; You, J., Aerobic copper-promoted radical-type cleavage of coordinated cyanide anion: nitrogen transfer to aldehydes to form nitriles. *J Am Chem Soc* **2016**, *138* (9): 2885-2888.
  47. Zou, T.; Yu, X.; Feng, X.; Bao, M., An efficient transformation of primary halides into nitriles through palladium-catalyzed hydrogen transfer reaction. *Chem Commun* **2015**, *51* (53): 10714-10717.
  48. Pawar, A. B.; Chang, S., Catalytic cyanation of aryl iodides using DMF and ammonium bicarbonate as the combined source of cyanide: a dual role of copper catalysts. *Chem Commun* **2014**, *50* (4): 448-450.
  49. Chouhan, M.; Kumar, K.; Sharma, R.; Grover, V.; Nair, V. A., NiCl<sub>2</sub>·6H<sub>2</sub>O/NaBH<sub>4</sub> in methanol: a mild and efficient strategy for chemoselective deallylation/debenzylation of aryl ethers. *Tetrahedron Lett* **2013**, *54* (34): 4540-4543.
  50. Utsumi, T.; Noda, K.; Kawachi, D.; Ueda, H.; Tokuyama, H., Nitrile synthesis by aerobic oxidation of primary amines and in situ generated imines from aldehydes and ammonium salt with grubbs catalyst. *Adv Synth Catal* **2020**, *362* (17): 3583-3588.
  51. Shetnev, A. A.; Pankratieva, V. E.; Kunichkina, A. S.; Vlasov, A. S.; Proskurina, I. K.; Kotov, A. D.; Korsakov, M. K., Synthesis of 3,5-disubstituted 1,2,4-oxadiazoles from amidoximes and aldehydes in the superbasic system NaOH/DMSO. *Russ J Org Chem* **2020**, *56* (7): 1181-1186.
  52. Xu, Z.; Xiao, Y.; Ding, H.; Cao, C.; Li, H.; Pang, G.; Shi, Y., Palladium/N-heterocyclic carbene catalyzed mono- and double-cyanation of aryl halides using potassium ferrocyanide trihydrate under aerobic conditions. *Synthesis* **2015**, *47* (11): 1560-1566.
  53. Lambert, K. M.; Bobbitt, J. M.; Eldirany, S. A.; Kissane, L. E.; Sheridan, R. K.; Stempel, Z. D.; Sternberg, F. H.; Bailey, W. F., Metal-free oxidation of primary amines to nitriles through coupled catalytic cycles. *Chem-Eur J* **2016**, *22* (15): 5156-5159.
